# 1 Gaps and Opportunities for Data Systems and 2 Economics to Support Priority Setting for Climate- 3 Sensitive Infectious Diseases in Sub-Saharan Africa: 4 A Rapid Scoping Review

---

5

## 6 Authors

7 Ellie A. Delight<sup>1\*</sup>, Ariel A. Brunn<sup>2</sup>, Francis Ruiz<sup>3</sup>, Jessica Gerard<sup>1</sup>, Jane Falconer<sup>4</sup>,  
8 Yang Liu<sup>5</sup>, Bubacarr Bah<sup>6</sup>, Bernard Bett<sup>7</sup>, Benjamin Uzochukwu<sup>8</sup>, Oladeji K. Oloko<sup>9</sup>,  
9 Esther Njuguna<sup>10</sup>, Kris A. Murray<sup>9</sup>.

10

## 11 Affiliations

12 <sup>1</sup>Department of Disease Control, London School of Hygiene and Tropical Medicine,  
13 Keppel Street, London, WC1E 7HT, United Kingdom

14 <sup>2</sup>Department of Population Health, London School of Hygiene and Tropical Medicine,  
15 Keppel Street, London, WC1E 7HT, United Kingdom

16 <sup>3</sup>Department of Global Health and Development, London School of Hygiene and  
17 Tropical Medicine, Keppel Street, London, WC1E 7HT, United Kingdom

18 <sup>4</sup>Library, Archive & Open Research Services, London School of Hygiene and  
19 Tropical Medicine, Keppel Street, London, WC1E 7HT, United Kingdom

20 <sup>5</sup>Department of Infectious Disease Epidemiology and Dynamics, London School of  
21 Hygiene and Tropical Medicine, Keppel Street, London, WC1E 7HT, United Kingdom

NOTE: This preprint reports new research that has not been certified by peer review and should not be used to guide clinical practice.

22 <sup>6</sup>Data Science Cluster, Medical Research Council Unit The Gambia at the London  
23 School of Hygiene and Tropical Medicine, Atlantic Boulevard, Fajara, Banjul, The  
24 Gambia

25 <sup>7</sup>Education and Outreach Centre for Africa, International Livestock Research  
26 Institute, Old Naivasha Road, Uthiru, Box 30709, Nairobi, Kenya

27 <sup>8</sup>Department of Community Medicine, University of Nigeria, Enugu Campus, 410001,  
28 Nigeria

29 <sup>9</sup>Centre on Climate Change and Planetary Health, MRC Unit The Gambia at London  
30 School of Hygiene and Tropical Medicine, Atlantic Boulevard, Fajara, PO Box 273,  
31 The Gambia

32 <sup>10</sup>African Social and Gender Insights Group, Kangemi 00625, Nairobi, Kenya

33

34 \*Corresponding author

35 Email: [elliedelight@outlook.com](mailto:elliedelight@outlook.com)

36

## 37 **Abstract**

---

38 Climate change alters risks associated with climate-sensitive infectious diseases  
39 (CSIDs) with pandemic potential. This poses additional threats to already vulnerable  
40 populations, further amplified by intersecting social factors, such as gender and  
41 socioeconomic status. Currently, critical evidence gaps and inadequate institutional  
42 and governance mechanisms impact on the ability for African States to prevent,  
43 detect and respond to CSIDs. The aim of this study was to explore the role of data  
44 systems and economics to support priority setting for CSID preparedness in sub-  
45 Saharan Africa.

46

47 We conducted a rapid scoping review to identify existing knowledge and gaps  
48 relevant to economics and data systems. A literature search was performed across  
49 six bibliographic databases in November 2023. A list of 14 target pathogens,  
50 identified by the World Health Organization as Public Health Emergencies of  
51 International Concern or R&D Blueprint Pathogens, was adopted and compared to a  
52 database of CSIDs to determine relevant inclusion criteria. Extracted data were  
53 synthesised using bibliometric analysis, thematic topic categorisation, and narrative  
54 synthesis to identify research needs, evidence gaps, and opportunities for priority  
55 setting.

56

57 We identified 68 relevant studies. While African author involvement has been  
58 increasing since 2010, few studies were led by senior authors from African  
59 institutions. Data system studies (n = 50) showed broad coverage across CSIDs and  
60 the WHO AFRO region but also a high degree of heterogeneity, indicating a lack of  
61 clearly defined standards for data systems related to pandemic preparedness.  
62 Economic studies (n = 18) primarily focused on COVID-19 and Ebola and mostly  
63 originated from South Africa. Both data system and economic studies identified  
64 limited data sharing across sectors and showed a notable absence of gender  
65 sensitivity analyses. These significant gaps highlight important opportunities to  
66 support priority setting and decision-making for pandemic preparedness, ultimately  
67 leading to more equitable health outcomes.

68

## 69 **Introduction**

---

70 Rising greenhouse gas (GHG) emissions impact the frequency and intensity of  
71 climate hazards (e.g., temperature, rainfall) and extremes (e.g., droughts, floods, and

72 heatwaves), which can aggravate the transmission of climate-sensitive infectious  
73 diseases (CSIDs) (1). Additionally, changing climate patterns alter ecological niches  
74 where humans, animals and vectors are able to survive (2). In conjunction with  
75 changing land-use patterns, these altered ecological settings and climate hazards  
76 can impact pathogen exchange among previously isolated vectors, wildlife, livestock,  
77 and human populations (3, 4). This can expose immunologically naïve populations to  
78 CSIDs, leading to increased risk of CSID pandemics. Notably, all eight of the viral  
79 diseases declared as Public Health Emergencies of International Concern (PHEIC)  
80 by the World Health Organization (WHO) (5) are climate-sensitive according to a  
81 recent review (1), including COVID-19 and Mpox. Additionally, eight of the nine  
82 pathogens prioritised by the WHO Research & Development (R&D) Blueprint list are  
83 classed as climate-sensitive (6). The R&D list helps to prioritise R&D resources  
84 towards pathogens that pose significant public health risk due to their epidemic  
85 potential or insufficient control measures.

86

87 Vulnerability to CSIDs is further driven by marginalisation coupled with social  
88 determinants of health such as gender, socioeconomic status, race, and disability.  
89 The intersectional gendered risks of CSIDs were evident in the COVID-19 pandemic,  
90 where the case fatality rate was higher among men (7), but women faced greater  
91 socioeconomic impacts and increased risk of domestic violence as a result of  
92 lockdown restrictions (8, 9). Adopting an intersectional gender lens in CSID research  
93 can enable a more contextualised and thorough understanding of the aetiology of  
94 CSIDs, advocating for an equitable approach to CSID pandemic response tailored to  
95 men, women, boys, girls, and other gender identities (10).

96

97 A growing body of evidence demonstrates the disproportionate impact of climate  
98 change across countries in sub-Saharan Africa, despite minimal contributions to  
99 GHG emissions (11-13). Some limited studies have evaluated the risk of CSIDs in  
100 sub-Saharan Africa; for instance, in low-income, rural communities in the Sahel  
101 region of West Africa, daily high temperatures (above 41.1 °C compared to 36.4°C  
102 median) and low rainfall (below 10mm compared to 14mm median) were associated  
103 with increased deaths from CSIDs (13). Additionally, climate hazards such as  
104 flooding can prevent access to healthcare services, which can cause diagnostic and  
105 treatment delays (14), impeding early detection of outbreaks and raising the risk of  
106 uncontrolled disease spread and pandemic emergence.

107

108 The ability to prepare for the outsized risks of CSID pandemics in sub-Saharan  
109 Africa is limited by weak institutional collaborations or integrated governance  
110 mechanisms. This hinders data-driven decision-making and appropriate and  
111 judicious allocation of scarce resources. Successful policy response requires  
112 capacity on both sides of the research-policy nexus, including skilled researchers  
113 generating robust data and relevant economic evaluation, and presence of  
114 formalised systems or bodies to build confidence and public support for the  
115 deployment of public funds during a public health crisis. Interoperable data systems  
116 that provide near real-time information across human, animal, and environmental  
117 domains inform decision-making for the detection and prevention of CSIDs.  
118 Additionally, data systems can help to inform decision-making across later stages of  
119 pandemic preparedness; for example by helping to tailor control strategies to  
120 regional climate differences that would otherwise hamper response strategies (15).

121

122 Priority setting is a process that can help manage complex decision-making and may  
123 be especially beneficial in pandemic response, particularly in low-resource settings  
124 where policy makers must balance emergency needs with regular health programs.  
125 Recent outbreaks, such as the 2014 Ebola outbreak in West Africa (16) and more  
126 recently with COVID-19 globally, illustrate the long-lasting economic and health  
127 consequences of pandemics. Understanding the cost-effectiveness of interventions  
128 and response can aid decision-makers in allocating scarce resources during  
129 pandemic response. This can incorporate economic evaluation (such as cost-  
130 effectiveness analyses (CEA), cost-utility analyses (CUA), or cost-benefit analyses  
131 (CBA)), which are ideally institutionalised and include approaches such as Health  
132 Technology Assessment (HTA) that consider a body of evidence and multi-  
133 stakeholder perspectives.

134

135 Effective priority setting with respect to pandemic preparedness and CSIDs, or  
136 indeed in any situation where a resource allocation decision needs to be made,  
137 should be informed by evidence of both likely benefits and cost-effectiveness (17). In  
138 turn, such assessments of value depend on credible sources of information, even  
139 though assumptions and the need to make qualitative judgements are unavoidable.  
140 Priority setting is therefore facilitated by having fit-for-purpose (and cost-effective)  
141 data systems that capture contextualised information on epidemiology, vulnerable  
142 groups, resource use, and other relevant socio-economic characteristics. As such,  
143 data systems are key to informing CSID control strategies, and supporting the  
144 parameterisation of economic evaluations that help to consider the benefits of  
145 available strategies against the resources required to implement them.

146

147 To identify existing knowledge and gaps relevant to data system and economic  
148 studies for priority setting of CSIDs with pandemic potential, we extended a  
149 conceptual framework across four stages of pandemic preparedness: Prevention  
150 (Stage 1): pre-epidemic preparedness; Detection (Stage 2): identify, investigate,  
151 evaluate risk; Response (Stage 3): outbreak response & containment; Evaluation  
152 (Stage 4): Post-epidemic evaluation (18) (Fig 1).

153

154 **Fig 1. Pandemic Preparedness Framework for Climate Sensitive Infectious**  
155 **Disease in Africa. Adapted from: World Health Organization. (2014). Ebola and**  
156 **Marburg virus disease epidemics: Preparedness, alert, control, and evaluation.**  
157 <https://www.who.int/publications-detail-redirect/WHO-HSE-PED-CED-2014.05>

158

## 159 **Rationale**

160 Low- and middle-income countries contribute the least to anthropogenic climate  
161 change but are highly vulnerable to its impacts, with important implications for public  
162 health. It is crucial to identify evidence gaps, establish future research priorities, and  
163 strengthen stakeholder networks at the climate-health intersection to direct research  
164 funding and inform policies that enhance health outcomes and resilience of health  
165 systems for vulnerable populations. This necessitates multidisciplinary and  
166 comprehensive government approaches, leveraging more integrative disciplines  
167 such as One Health and Planetary Health, with an emphasis on intersectional  
168 gendered analysis to ensure representation of marginalised communities. By  
169 deepening our understanding of the climate-health nexus, we can develop more  
170 effective strategies for preventing, detecting, and responding to disease outbreaks.

171

## 172 **Objectives**

- 173 i. To map key themes and entry points for future African-led research and to  
174 identify gaps in evidence for priority setting using economic evaluation and  
175 data systems for policy development;
- 176 ii. To use bibliometric analysis to assess institutional stakeholder networks  
177 and to evaluate trends in research development on key themes and  
178 outputs included in the review;
- 179 iii. To identify applications for a transdisciplinary and gender-intersectional  
180 approach for CSID preparedness and response.

## 181 **Research questions**

- 182 i. What are the key themes, in terms of economic evaluation (including cost-  
183 effectiveness) and priority setting, that describe how climate change is  
184 incorporated into pandemic preparedness and outbreak response  
185 planning?
- 186 ii. What data systems are currently in use or needed to support priority  
187 setting for integrated and multisectoral epidemic or pandemic planning for  
188 climate-sensitive infectious diseases in Africa?
- 189 iii. What subnational, national, and regional structures are in place to support  
190 joined-up data sharing for CSID outbreak detection and response within  
191 and between African countries and the international community?

## 193 **Methods**

---

194



## 195 **Rapid Scoping Review**

196 The literature review was conducted as a rapid scoping review. Scoping reviews  
197 provide a structured approach to mapping existing knowledge, highlighting common  
198 themes, and identifying evidence gaps. Rapid reviews streamline these methods,  
199 facilitating quicker knowledge translation, especially when urgent policy or strategy  
200 decisions are required (19).

## 201 **Protocol and registration**

202 This rapid scoping review was informed by the Preferred Reporting Items for  
203 Systematic Reviews and Meta-Analyses for Scoping Reviews (PRISMA-ScR). The  
204 protocol for this study is registered at the Open Science Framework (OSF) repository  
205 (20) and is available on MedRxiv (21).

## 207 **Eligibility criteria**

208 The eligibility criteria are outlined in Table 1.

210 *Table 1. Scoping Review Eligibility Criteria*

| Criteria                  | Inclusion                                                                                                                                                      | Exclusion                                                                                                                                      |
|---------------------------|----------------------------------------------------------------------------------------------------------------------------------------------------------------|------------------------------------------------------------------------------------------------------------------------------------------------|
| <b>Publication Period</b> | 2010 - 2023                                                                                                                                                    | Articles outside this period.                                                                                                                  |
| <b>Location</b>           | Articles relevant to and published in or about countries or regions in sub-Saharan Africa, defined as any member states of the WHO African Region (AFRO) (22). | Articles relevant to or published outside of sub-Saharan Africa, articles not geographically located, or articles on globally aggregated data. |
| <b>Language</b>           | Articles in English.                                                                                                                                           | Non-English language articles were excluded.                                                                                                   |

|                              |                                                                                                                                                                                                                                                                                                                                                                                                                                                                                                                                                                                                                                                                                                                                                                    |                                                                                                                                                                                                                                                                                                                                                                                                                                   |
|------------------------------|--------------------------------------------------------------------------------------------------------------------------------------------------------------------------------------------------------------------------------------------------------------------------------------------------------------------------------------------------------------------------------------------------------------------------------------------------------------------------------------------------------------------------------------------------------------------------------------------------------------------------------------------------------------------------------------------------------------------------------------------------------------------|-----------------------------------------------------------------------------------------------------------------------------------------------------------------------------------------------------------------------------------------------------------------------------------------------------------------------------------------------------------------------------------------------------------------------------------|
| <b>Study Type</b>            | Original research, literature reviews, reports, policy briefs, opinion pieces and editorials.                                                                                                                                                                                                                                                                                                                                                                                                                                                                                                                                                                                                                                                                      | News articles and conference abstracts.                                                                                                                                                                                                                                                                                                                                                                                           |
| <b>Pandemic Preparedness</b> | Articles that assessed preparedness that can be contextualised within the WHO (2014) Pandemic Preparedness Framework (18).                                                                                                                                                                                                                                                                                                                                                                                                                                                                                                                                                                                                                                         | NA                                                                                                                                                                                                                                                                                                                                                                                                                                |
| <b>Climate change</b>        | Articles that referred to infectious diseases impacted by climate change; this encompasses weather variables, hydrometeorological hazards and land-use change over short or long (decadal) time spans.<br>CSIDs of zoonotic origin that have developed a human-to-human transmission cycle are included even if the subsequent transmission is no longer sensitive to climate covariates.<br>CSIDs with pandemic potential are adapted from the WHO R&D Blueprint Disease List (6) and PHEIC diseases (5): Influenza A; Ebolavirus and Marburg virus; Zika virus; Severe Acute Respiratory Syndrome; Middle East Respiratory Syndrome; COVID-19; Crimean-Congo Haemorrhagic Fever; Lassa Fever; Nipah and Henipavirus Disease; Rift Valley fever; Mpox; Disease X. | Articles that consider climate change-related hazards such as extreme weather as a barrier to healthcare facility access were excluded.<br>Articles that refer to climate in a cultural sense, i.e. political climate, were excluded.<br>Articles about allergens, fungal diseases and AMR are excluded in this review, although it is acknowledged that these disease processes are increasingly being linked to climate change. |
| <b>Health Economic Theme</b> | Articles that described the use of health technology assessment (HTA), priority setting, cost effectiveness or cost-benefit analysis, and costing studies in the context                                                                                                                                                                                                                                                                                                                                                                                                                                                                                                                                                                                           | Articles that did not provide analysis or discussion in the context of pandemic preparedness or climate change.                                                                                                                                                                                                                                                                                                                   |

|                           |                                                                                                                                                                                                                                                                                                                                                                     |                                                                                                           |
|---------------------------|---------------------------------------------------------------------------------------------------------------------------------------------------------------------------------------------------------------------------------------------------------------------------------------------------------------------------------------------------------------------|-----------------------------------------------------------------------------------------------------------|
|                           | of pandemic preparedness and climate change.                                                                                                                                                                                                                                                                                                                        |                                                                                                           |
| <b>Data Systems Theme</b> | Articles that described, proposed, or analysed collaborative transdisciplinary data sharing systems including environmental or animal health data systems centred on enhancing infectious disease detection, surveillance, and control.                                                                                                                             | Articles that mentioned data or information systems not relevant to a health or health economics context. |
| <b>Outcomes</b>           | Descriptions of frameworks, data system or health information system structures, case study outcomes, trial outcomes, best practices, evidence syntheses including meta-analyses results and cost-effectiveness findings. Specific outcomes extracted include: study population, location of research, interventions, timeframe and evaluation methods and results. | Global economic evaluations and global meta-analyses where African data is not extractable.               |

211

## 212 Information sources and search

213 The search strategy was constructed by a library information professional with a focus  
 214 on four search concepts, namely:

- 215 • Pandemic preparedness AND
- 216 • Climate change AND
- 217 • Economic evaluation (including HTAs and priority setting) OR
- 218 • Data systems

219

220 The search was conducted in November 2023 across six bibliographic databases:  
221 OvidSP Medline, OvidSP Embase, OvidSP Global Health, EBSCOhost Africa-Wide  
222 Information, OvidSP Econlit and Clarivate Analytics Web of Science Core Content.  
223 Search terms were first tested in one database prior to implementation in the other  
224 five. Additional sources of literature from work previously conducted by co-authors  
225 were also included. The complete search strategies for all sources is published at the  
226 London School of Hygiene & Tropical Medicine Data Compass (23).

227

## 228 **Selection of sources of evidence**

229 Articles were deduplicated and imported into Covidence software (24). Screening was  
230 conducted by single independent reviewers through a three-stage process: title,  
231 abstract, and full text screening. At each stage, articles were screened using the "Most  
232 relevant" option in Covidence, which employs a machine learning algorithm to predict  
233 study relevance based on screening of at least 25 studies (25).

234

235 Pilot review stages were conducted prior to the abstract and full text screening stages.  
236 Prior to the abstract screening stage, the complete team of nine reviewers  
237 independently screened abstracts from the same 20 articles and discussed  
238 discrepancies to improve consistency. Once consensus was reached, two reviewers  
239 independently screened the abstracts for relevance (see S1 Table). Prior to the full  
240 text screening stage, two reviewers screened three sets of ten full text publications to  
241 iteratively refine screening questions. Once consensus was reached, nine reviewers  
242 independently screened the full texts against the full text screening criteria (Fig 2). Any  
243 article deemed relevant at the full text screening stage was screened in duplicate by  
244 another reviewer to reach consensus.

245

246 **Fig 2. Full text screening criteria.**

## 247 **Data charting process**

248 The data charting process was conducted using a data extraction form in Covidence  
249 designed by one reviewer and reviewed *a priori* by two reviewers with expertise in the  
250 relevant areas. The form was tested against 15 papers by one reviewer and iteratively  
251 refined prior to use.

## 252 **Data items**

253 The data extracted included article meta-data and thematic content. Article meta-data  
254 included year of publication, publication source (institution and country), first and last  
255 authors' names and institutions, collaborating institutions, source of funding, ethical  
256 clearance, and type of publication. Topic data were extracted and thematically  
257 categorised based on stage of pandemic preparedness and response framework (Fig  
258 1), relevance to target CSIDs (Table 1), and type of data system or economic study.  
259 A final mapping of challenges and constraints was conducted by assessing topics with  
260 the least volume or least relevant literature, and by conducting a narrative synthesis  
261 identifying repeated themes describing evidence gaps arising in the final study set.

## 262 **Synthesis of results**

263 The PRISMA flow diagram was created using the PRISMA2020 template (26). We  
264 used bibliometric analysis, topic mapping, and narrative summaries to synthesise  
265 evidence.

266

267 A bibliometric analysis was conducted by assessing the temporal trends of  
268 authorship and CSIDs studied as well as geographical distribution of the studies  
269 across the WHO AFRO region. Temporal trends of authorship were assessed by  
270 categorising the institutional affiliations of all authors as follows: African - all author  
271 affiliations located within Africa; African & International - author affiliations located  
272 both within Africa and internationally; and International - all author affiliations located  
273 outside of Africa.

274

275 Topic mapping was conducted by categorising the proportion of data system or  
276 economic studies relevant to each stage of pandemic preparedness and each CSID.

277

278 A narrative synthesis was conducted by categorising data system and economic  
279 studies into sub-categories, summarising identified evidence gaps noted by the study  
280 authors, and assessing the gender sensitivity of each study. Data system studies  
281 were categorised into two sub-categories: 'Design', which included studies that  
282 describe the use of multi-disciplinary data systems in pandemic preparedness; and  
283 'Usage', which included multidisciplinary analyses that use data from data systems  
284 for analyses relevant to pandemic preparedness. The categorisation by this method  
285 was chosen to account for the large heterogeneity in the data system studies.

286 Economic studies were categorised into three sub-categories based on study type:  
287 Economic evaluations, which include analyses that compare costs of interventions  
288 with health outcomes, inclusive of CEAs, CUAs, CBAs, whether or not conducted as  
289 part of an HTA; costing studies, which include analyses that consider costs without  
290 consideration of health outcomes; and priority setting studies, which are more

291 conceptual or commentary based studies that consider the benefit of economic  
292 studies for pandemic preparedness.

293

294 The extent that gender was considered across the studies was assessed against  
295 definitions provided by the WHO intersectionality gender toolkit for research on  
296 infectious diseases of poverty (10), including: Gender-blind research ignores gender  
297 norms, roles, and relations; Gender-sensitive research considers inequality  
298 generated by unequal gender norms, roles, and relations but takes no remedial  
299 action to address it; Gender-specific research considers inequality generated by  
300 unequal norms, roles, and relations and takes remedial action to address it but does  
301 not change underlying power relations.

302

303 All analyses were conducted in Microsoft Excel (27), and figures were produced in R  
304 version 4.3.1 via R studio (28). The data extracted from included studies can be  
305 found at the OSF  
306 ([https://osf.io/fn8rw/?view\\_only=5961c57df32741b884fc2181a0da4ceb](https://osf.io/fn8rw/?view_only=5961c57df32741b884fc2181a0da4ceb)).

307

## 308 **Protocol amendments**

309 We applied two protocol amendments to our review. First, we refined the fourth  
310 abstract screening question relating to data systems; specifically, we applied more  
311 stringent criteria to how we defined data systems. This amendment was required given  
312 the large volume of literature utilising data from data systems. Second, we did not  
313 conduct a pilot of data extraction in duplicate. Instead, the data extraction form was  
314 produced by one reviewer and refined by two reviewers with extensive experience in

315 either economics or data systems. The form was then applied to ten studies by an  
316 independent reviewer and iteratively refined prior to use across the final studies.

317

## 318 **Results**

---

### 319 **Selection of sources of evidence**

320 The screening process overview is presented in a PRISMA flow chart (Fig 5). A search  
321 across six databases resulted in the identification of 14,252 items and an additional  
322 112 studies were retrieved from previous reviews conducted by the research team.  
323 After removal of 7,059 duplicate studies, 7,305 studies were screened. During  
324 screening, 2,255 studies and then 4,774 studies were removed at the title and abstract  
325 screening stages respectively. A total of 276 full texts were screened, culminating in  
326 68 studies that were relevant for data extraction. Of the 68 studies, 50 and 18 were  
327 categorised as data system and economic studies, respectively.

328

329 **Fig 3. PRISMA-ScR flow diagram of study selection.**

### 330 **Bibliometric Analysis**

#### 331 **Temporal publication trends**

332 The frequency of publications increased between 2010 and 2023 (Fig 4a).  
333 Authorship trends indicate increasing involvement of researchers based in African  
334 institutions in CSID research since 2010, though mixed institutional research teams  
335 continue to be dominated by institutions based worldwide up to the most recent year.  
336 African-only authorship, where all authors were affiliated with African-based  
337 institutions, emerged in 2018 and peaked in 2020. Further breakdown of authorship



338 found that most first authors were affiliated with global institutions (69%) rather than  
339 African institutions (29%), and one author was affiliated to both global and African  
340 institutions. Similarly, most senior authors were affiliated with institutions outside  
341 Africa (63%) compared with African institutions (34%), and two authors had more  
342 than one institutional affiliation in and outside of Africa. COVID-19, Ebola, Influenza,  
343 and Rift Valley fever were the most studied target CSIDs (Fig 4b).

344

345 **Fig 4. Number of studies published over time, by geographical distribution of**  
346 **authors (A), and four most frequently cited CSIDs (B).**

### 347 **Geographical publication trends**

348 Data system studies showed broad coverage across the WHO AFRO region,  
349 whereas economic studies were much more concentrated in certain countries (Fig  
350 5). Of the data system studies (n = 50), all countries in the WHO AFRO region were  
351 represented in at least one study, largely due to three regional-based studies that  
352 included all countries. Nigeria was the most represented country in data system  
353 studies, appearing in 36% (18/50) of studies, followed by Ghana and Kenya, which  
354 were each represented in 32% (16/50) of studies. In contrast, of the economic  
355 studies (n = 18), nearly half of the WHO AFRO countries were not represented at all.  
356 South Africa was the most frequently studied country in economic studies, appearing  
357 in 28% (5/18) of studies, followed by Ghana and Sierra Leone, each represented in  
358 22% (4/18) of studies.

359

360 **Fig 5. Distribution of (A) data system studies and (B) economic studies. The**  
361 **distribution of countries was plotted as percentage of frequency of country**  
362 **included across data system or economic studies by total number of data**

363 **system or economic studies. Countries coloured in grey correspond to**  
364 **countries outside of the WHO AFRO region.**

## 365 **Topic mapping**

### 366 **Stage of pandemic preparedness**

367 Topic mapping of studies to pandemic preparedness stages revealed distinct focus  
368 areas between data system and economic studies, with data systems being more  
369 prevalent in earlier stages of pandemic preparedness while economic studies were  
370 more concentrated in the later stages (Fig 6). A higher proportion of data system  
371 studies were linked to stages 1 and 2 (46% and 28%, respectively) compared with  
372 stages 3 or 4 (19% and 9%, respectively). Conversely, a higher proportion of  
373 economic studies were linked to stages 3 or 4 (55% and 26%, respectively)  
374 compared with stages 1 or 2 (10% across both stages).

375

376 **Fig 6. Percentage of data system or economic studies mapped to stages of**  
377 **pandemic preparedness. Studies could be relevant to all four stages;**  
378 **percentage was calculated as tagged stage by total of tagged stages in data**  
379 **system studies (n = 50) or economic studies (n = 18).**

### 380 **Climate-sensitive infectious diseases**

381 Topic mapping of studies to CSIDs revealed broad coverage across all CSIDs in  
382 data system studies, with Rift Valley fever and Ebola virus disease being the most  
383 common (Fig 7). Specifically, data system studies were predominantly focused on  
384 five CSIDs: Rift Valley fever (25%), Ebola virus disease (16%), Influenza (14%),  
385 COVID-19 (14%), and Lassa fever (9%), although each CSID was represented at

386 least once in the included studies. In contrast, economic studies were restricted to  
387 four CSIDs, predominantly focusing on COVID-19 (64%) and Ebola (27%). Influenza  
388 and Rift Valley fever were each addressed in 4% of the studies, with both being  
389 analysed within the same publication that also covered Ebola (29).

390

391 **Fig 7. Frequency of CSIDs across (A) data system and (B) economic studies.**

392 **Studies could be mapped to more than one CSID. Abbreviations: COVID-19:**

393 **Coronavirus Disease 2019; SARS: Severe Acute Respiratory Syndrome; MERs:**

394 **Middle East Respiratory Syndrome.**

## 395 **Narrative Synthesis: Data system studies**

396 The following sections provide a narrative summary mapped to the type of study  
397 identified through our screening criteria and the evidence gaps identified by the study  
398 authors.

399

400 The 50 data system studies were categorised into 'Design' studies (n = 19) or  
401 'Usage' studies (n = 33). Design studies described data systems in pandemic  
402 preparedness, while Usage studies were multidisciplinary analyses that integrated  
403 data from data systems across two or more data domains across animal, human, or  
404 environmental domains. Three studies were categorised as both Design and Usage  
405 studies (30-32).

406

### 407 **Design data system studies**

408 Of the 19 studies that described data systems in pandemic preparedness (i.e.,  
409 Design studies), 10 were original research (30, 32-40), five were literature reviews,

410 (41-45), two were outbreak response case studies (46, 47), one was a commentary  
411 (48), and one was a letter to the editor (49).

412

413 Across the 19 Design data system studies, 28 data systems were described with  
414 international, regional, national, or local scales (Fig 8, S2 Table). Seven of the data  
415 systems were surveillance systems integrating human, animal, or environmental  
416 domains (33, 41-44, 47); six were early warning systems (32, 35, 38, 40, 45); four  
417 described community-based surveillance systems (33, 36, 44, 49); two were mobile  
418 surveillance tools used in participatory disease surveillance methods (33, 34); two  
419 were communication tools designed to share risk maps (30, 45); two were diagnostic  
420 laboratory systems (42, 46); two were online genomic sequencing systems (31, 48);  
421 two were capacity systems to assess one health capacity of countries (39) or  
422 coordinate a pandemic response (46); and one study focused on off-line software  
423 designed to aid users to predict the causative pathogen of an outbreak (37).

424

#### 425 **Fig 8. Frequency of Design data systems by type and scope.**

426 The varying scopes of data systems demonstrate evidence of data sharing for CSID  
427 outbreak detection and response across local (36, 46), national (32, 38, 40, 43, 46,  
428 47, 49), regional (33, 34, 39, 41, 44), and international levels (30, 31, 33, 35, 37, 42,  
429 45, 48). For example, a local community-based surveillance system in forested areas  
430 of Guinea facilitated information exchange across human, animal, and environmental  
431 sectors for effective Ebola and Lassa fever response (36). At the national level, the  
432 piloted Kenya Animal Biosurveillance System was an early warning system aimed at  
433 timely data sharing of Rift Valley fever-associated risk factors and syndromes to  
434 detect livestock disease and respond before spill-over to humans (38). Regional

435 data-sharing was evident across the Community-based Active Surveillance and  
436 District-based Passive Surveillance systems, part of the Southern Africa One Health  
437 Surveillance Strategy, which uses EpiCollect mobile software to enhance disease  
438 event detection in human and animal populations, and share data across prospective  
439 sectors (33). International structures included mapping communication tools such as  
440 MosquitoMap (45) and VizHub (30), which enable online sharing of maps that  
441 quantify risk of vector abundance or pathogen transmission with relevant  
442 stakeholders.

443

444 Design data system studies identified limitations in data availability, data sharing  
445 across sectors, and surveillance capacity. These limitations encompassed factors  
446 such as funding (34, 46) and data availability or reporting issues within the animal  
447 sector (38, 43). In the human sector, delays in reporting were often attributed to  
448 paper-based data transmission and inadequate infrastructure (33, 38, 40, 45).

449 Collaborative efforts across the human, animal, and environmental sectors were  
450 hindered (36, 39, 41, 44, 47, 49) by the absence of standardised guidelines, policies,  
451 or frameworks (39, 44). Additionally, studies pointed out limitations in surveillance or  
452 laboratory capacity (45, 48, 49).

453

454 The identified evidence needs encompassed inclusion of vulnerable groups through  
455 digitally enabled participatory methods and increased cross-sectoral data sharing.  
456 Specifically, these needs encompass the integration of vulnerable groups into  
457 disease surveillance (33, 43, 48, 49) or control efforts (34) through adoption of  
458 participatory methods harnessing mobile phone technologies (38, 43). Additionally,  
459 studies advocated for incorporation of climate data into analyses to enhance

460 understanding of CSID transmission and development of early warning systems (35),  
461 or long-term planning of response, control, and mitigation strategies (2).  
462 Furthermore, studies described a need for greater political will and capacity to  
463 facilitate data-sharing across human and animal sectors (31, 33, 41, 43, 48, 49)  
464 underpinned by established data standards, protocols, or centralised platforms (33,  
465 38-41, 44, 45, 49), the pooling of multisectoral funds to support One Health policies  
466 (41) and increased private sector (46) or governmental (34) financial support. Other  
467 needs included the incorporation of fine-scale data collected across broader regions  
468 (50, 51), utilisation of modelling studies to direct surveillance resources (42, 47, 50),  
469 and bolstered veterinary (42, 49) and laboratory (40, 41) capacities to effectively  
470 address challenges posed by CSIDs.

471

## 472 **Usage data system studies**

473 Of the 33 multidisciplinary studies that integrated data from data systems (i.e.,  
474 Usage studies), 12 were risk mapping studies (30, 32, 52-61), ten were association  
475 studies (50, 62-70), seven were both risk mapping and association studies, and four  
476 were phylogenetic analyses (31, 51, 71, 72) (Fig 9, S3 Table). We did not find any  
477 attribution studies. The different study types included varying domains across  
478 human, animal, and environmental data. For example, most association studies (n =  
479 7) investigated the association of environmental variables on human response  
480 variables, such as that of ambient temperature exposure on COVID-19 transmission,  
481 whereas all phylogenetic analyses (n = 4) investigated spill-over between humans  
482 and animals.

483

484 **Fig 9. Frequency of Usage data systems study by study type and integration of**  
485 **data domain.**

486 Evidence gaps identified in Usage studies surrounded data availability and cross-  
487 sector data sharing or coordination. Specifically, gaps revolved around inadequate  
488 availability of animal health data, often stemming from weak surveillance across the  
489 animal sector (52, 53, 65, 73, 74) or spatial biases in sampling and surveillance data  
490 (2, 51, 58, 71, 72). Additionally, deficiencies were noted in coordination between  
491 human, animal, and environmental surveillance systems (57) compounded by  
492 limitations in reporting capacity (31, 70) and limited temporal and spatial resolution of  
493 selected environmental data (75).

494

495 Evidence needs described in Usage studies included increased empirical data  
496 collection during outbreaks (52, 53) or routine surveillance (65) supported by  
497 participatory approaches to ensure data collection and inclusion of vulnerable groups  
498 (57). Furthermore, there was a call for the adoption of an integrated, One Health  
499 approach to surveillance, emphasising cross-sectoral and transboundary  
500 collaboration (31) alongside improved data sharing across animal and human  
501 sectors (61, 71, 72). Such initiatives should be supported by established data  
502 standards (62). Additionally, studies recognised the need for human and animal data  
503 linkage on a fine spatial scale (50-53), coupled with the integration of environmental  
504 data to deepen our understanding of the impact of climate change on CSID  
505 transmission (2, 58, 59, 64, 67, 76). These insights would inform the allocation of  
506 surveillance or control strategies (59, 63, 75, 77).

507

## 508 **Gender-sensitivity of data system studies**

509 Of the data system studies that included human data (n = 41), 38 studies were  
510 considered gender-blind, two were considered to be gender-sensitive (37, 40), and  
511 one gender-specific (36). Of the gender-sensitive studies, one described a system  
512 for predicting the causative pathogen of an outbreak which was programmed to  
513 disaggregate by gender and age (37), and one study reported Rift Valley fever cases  
514 by gender (40). The authors of the gender-specific study included women as key  
515 stakeholders in a surveillance data system, acknowledging their important role in  
516 disease detection despite their frequent under-representation (36).

517

518 While gender-blind studies did not consider gender, some considered other  
519 marginalised groups including rural communities (43, 73), socioeconomically  
520 marginalised groups (43, 49, 73), or youth groups (46). Notably, two studies placed  
521 an emphasis on understanding the association of multiple demographic variables,  
522 such as age and socioeconomic status, with COVID-19 transmission, but did not  
523 include gender as a variable in the analysis (70, 78).

524

## 525 **Narrative Synthesis: Economic studies**

526 The 18 economic studies were comprised of economic evaluations (n = 10), which  
527 included CEAs and CUAs; costing studies (n = 3); and priority setting papers (n = 5).

528

## 529 **Economic evaluation studies**

530 Economic evaluation studies (n = 10) investigated the cost effectiveness of  
531 vaccination strategies (79-83), non-pharmaceutical interventions (NPIs) (84-86), or



532 clinical critical care treatments (87, 88), and were limited to COVID-19 (n = 8) or  
533 Ebola (n = 2) (Table 2).

534

535 Evidence gaps identified by the economic evaluation study authors highlighted  
536 significant deficiencies in data availability in relation to intervention efficacy and  
537 resource use/cost information and limited regional capacity for the conduct of  
538 economic evaluations. Specifically, studies reported a lack of data availability  
539 surrounding COVID-19 vaccination effectiveness (83), COVID-19 immunity data (79-  
540 81, 83), and costing data (83, 84). Some studies noted a lack of local data regarding  
541 COVID-19, necessitating reliance on UK estimates (83) or rendering the models  
542 unparameterizable to the local setting (87). Others discussed limited regional  
543 capacity for economic evaluations, specifically highlighting such aspects as an  
544 absence of established willingness to pay thresholds in South Africa (79) or more  
545 generally across LMICs (82); a limited ability to compare cost-effectiveness  
546 estimates due to a lack of economic evaluations (88); or a failure to consider health  
547 system restraints (80). Additionally, one study addressed the challenge of  
548 incorporating human productivity loss into economic analyses of Ebola (86).

549

550 Stated evidence needs included broadening cost-effectiveness analyses of vaccines  
551 to incorporate the far-reaching impacts of COVID-19 (83) and accounting for wealth  
552 inequity through subpopulation analyses (82). Additionally, extrapolation of  
553 epidemiological and economic models to other settings for informing vaccination  
554 purchasing (80), and incorporation of timing into evaluations for more realistic cost-  
555 effectiveness assessments (81).

556

| <b>First Author</b> | <b>Year of publication</b> | <b>Aims</b>                                                                                                                                                                                                     | <b>CSID(s)</b> | <b>Population considered</b> | <b>Intervention/ comparators</b>                                            | <b>Uncertainty analysis</b>                        | <b>Gender-lens</b>    |
|---------------------|----------------------------|-----------------------------------------------------------------------------------------------------------------------------------------------------------------------------------------------------------------|----------------|------------------------------|-----------------------------------------------------------------------------|----------------------------------------------------|-----------------------|
| Orangi (83)         | 2022                       | CEA to evaluate the potential epidemiological impact and cost-effectiveness of different vax roll-out scenarios in a Kenyan population that has already acquired a high-level immunity due to prior infections. | COVID-19       | Population of Kenya          | COVID-19 vaccination roll-out strategies.                                   | Univariate and probabilistic sensitivity analysis. | Gender-blind research |
| Reddy (84)          | 2021                       | CEA to assess clinical and economic outcomes and cost-effectiveness of COVID-19 control strategies in KwaZulu-                                                                                                  | COVID-19       | Population of KwaZulu-Natal  | Combinations of five NPIs across R = 1.5 and 1.2 epidemiological scenarios. | One-way and multiway sensitivity analysis          | Gender-blind research |

|              |      |                                                                                                             |          |                            |                                                                                             |                                                                                                       |                       |
|--------------|------|-------------------------------------------------------------------------------------------------------------|----------|----------------------------|---------------------------------------------------------------------------------------------|-------------------------------------------------------------------------------------------------------|-----------------------|
|              |      | Natal province, South Africa.                                                                               |          |                            |                                                                                             |                                                                                                       |                       |
| Reddy (79)   | 2021 | CEA to evaluate clinical outcomes and cost effectiveness of a COVID-19 vaccination program in South Africa. | COVID-19 | Population of South Africa | COVID-19 vax supply and vaccination pace strategies among $R_e = 1.4$ and 2-wave scenarios. | One-way and multi-way sensitivity analysis                                                            | Gender-blind research |
| Asamoah (85) | 2020 | CEA to evaluate NPIs against COVID-19 in Ghana and model transmission dynamics.                             | COVID-19 | COVID-19 cases in Ghana    | Combinations of five NPIs.                                                                  | Varied estimated parameter values to formulate parameters that would generate 'optimal control model' | Gender-blind research |
| Ruiz (80)    | 2023 | CEA of three key vaccination policy questions in response to COVID-19 pandemic in Nigeria (which vax,       | COVID-19 | Population of Nigeria      | COVID-19 vax types, viral vectors, delivery method, prioritisation groups.                  | Analysis conducted over a range of scenarios and presented as main results                            | Gender-blind research |

|                 |      |                                                                                                                                                                                                            |          |                                                            |                                                                   |                                    |                       |
|-----------------|------|------------------------------------------------------------------------------------------------------------------------------------------------------------------------------------------------------------|----------|------------------------------------------------------------|-------------------------------------------------------------------|------------------------------------|-----------------------|
|                 |      | who to prioritise, and how to deliver)                                                                                                                                                                     |          |                                                            |                                                                   |                                    |                       |
| Liu (81)        | 2022 | CEA investigating impacts of timing on COVID-19 disease burden in AU states.                                                                                                                               | COVID-19 | Population across 27 African countries                     | Vaccination (viral vector vaxs and mRNA vaxs), and no vaccination | Sensitivity analysis               | Gender-blind research |
| Obeng-Kusi (82) | 2022 | CEA investigating value-based price for an Ebola vax package considering how prices compare across countries that have experienced outbreaks (Democratic Republic of Congo, Liberia, Sierra Leone, Uganda) | Ebola    | 2014-2016 EVD cases in DRC, Liberia, Sierra Leone, Uganda. | Ebola vax package (vax, storage, maintenance, and administration) | Probabilistic sensitivity analyses | Gender-blind research |
| Kairu (87)      | 2021 | CEA of investments in essential care and advanced critical care                                                                                                                                            | COVID-19 | Hospitalised COVID-19 patients                             | Essential Care, Advanced Critical                                 | One-way sensitivity analysis and a | Gender-blind research |

|                 |      |                                                                                                                                                   |          |                                                                                                                      |                                                                              |                                                |                       |
|-----------------|------|---------------------------------------------------------------------------------------------------------------------------------------------------|----------|----------------------------------------------------------------------------------------------------------------------|------------------------------------------------------------------------------|------------------------------------------------|-----------------------|
|                 |      | during COVID-19 pandemic in Kenya.                                                                                                                |          | admitted between March 2020 and January 2021.                                                                        | Care, or maintaining status quo.                                             | probabilistic sensitivity analysis.            |                       |
| Beshah (88)     | 2023 | CEA of COVID-19 critical care intervention approaches: non-invasive (oxygen without intubation) and invasive (intubation) management in Ethiopia. | COVID-19 | COVID-19 patients (age 18+) enrolled at treatment centre and home-based isolation care between Jan 1 - May 31, 2021. | Non-invasive and invasive COVID-19 critical case management.                 | Probabilistic and one-way sensitivity analysis | Gender-blind research |
| Kellerborg (86) | 2020 | CEA of earlier interventions against Ebola in Sierra Leone.                                                                                       | Ebola    | EVD patients from 2014-2016 Sierra                                                                                   | Time period of interventions taking place (original time or 4 weeks earlier) | Univariate sensitivity analysis                | Gender-blind research |

|  |  |  |  |                   |  |  |  |
|--|--|--|--|-------------------|--|--|--|
|  |  |  |  | Leone<br>outbreak |  |  |  |
|--|--|--|--|-------------------|--|--|--|

558 Abbreviations: CEA: Cost-effectiveness analysis; Vax: Vaccine.

559

## 560 **Costing studies**

561 The three costing studies analysed the costs of various initiatives across vaccination  
562 programs, a surveillance system, and outbreak response. One study presented cost  
563 estimates of a COVID-19 vaccination program in Ghana utilizing the COVID-19  
564 Vaccination Introduction and Deployment Costing Tool, and undertaken under the  
565 leadership of the Ghana HTA program (89); another was a micro-costing study of a  
566 community-based surveillance (CBS) system for detecting Ebola and COVID-19  
567 (among non-target CSIDs) in Sierra Leone (90); and the final study costed the US  
568 CDC's response to Ebola outbreaks across Sierra Leone, Guinea, and Liberia (91)  
569 (Table 3).

570

571 Evidence gaps described in the studies included delays in reporting by community  
572 health workers within the CBS and inconsistency in performance incentives being  
573 distributed (90), and lack of cost records attained within Ebola outbreaks resulting in  
574 the potential underestimate of costs (91).

575

576 Evidence needs included using the established COVID-19 Vaccine Introduction and  
577 Deployment Costing (CVIC) tool for costing the introduction of vaccinations across  
578 LMICs (89) and incorporating reporting of symptoms of COVID-19 and other future  
579 emerging infections into existing CBS for an early-warning systems (90).

580 *Table 3: Summary of costing studies*

| <b>First Author<br/>(Reference)</b> | <b>Year of<br/>publication</b> | <b>Aims</b>                                                                                                                                   | <b>CSID(s)</b>     | <b>Population considered</b>                                                          | <b>Uncertainty<br/>analysis</b> | <b>Gender-lens</b>    |
|-------------------------------------|--------------------------------|-----------------------------------------------------------------------------------------------------------------------------------------------|--------------------|---------------------------------------------------------------------------------------|---------------------------------|-----------------------|
| Nonvignon<br>(89)                   | 2022                           | Costing study to present cost estimates of COVID-19 vax program in Ghana utilising the COVID-19 Vax Introduction and Deployment Costing tool. | COVID-19           | All Ghanaians aged 16 years and above and are not pregnant.                           | Multi-way sensitivity analysis. | Gender-blind research |
| Mergenthaler<br>(90)                | 2023                           | Costing study of CBS in Sierra Leone as part of the electronic IDSR systems in context of Ebola and COVID-19.                                 | Ebola;<br>COVID-19 | Sierra Leone health system (Micro-costing study from a health system perspective)     | NR                              | Gender-blind research |
| Carias (91)                         | 2018                           | Costing study of the US CDC's response to Ebola outbreaks in Sierra Leone, Guinea, and Liberia.                                               | Ebola              | Three Ebola outbreak clusters from 2016 in Sierra Leone, Guinea, and Liberia/Somalia. | NR                              | Gender-blind research |

581 Abbreviations: CBS: Community-based surveillance.



## 582 **Priority setting studies**

583 Priority setting papers described the role of economic evaluations and associated  
584 priority setting tools or guidelines to support decision-making. Among the five  
585 studies, one described the application of HTAs for equitable decision-making in  
586 COVID-19 in LMICs (92), while another described the Evidence-to-Decision  
587 Framework utilised by the South African Grading of Recommendations Assessment,  
588 Development and Evaluation (GRADE) network to generate 42 rapid reviews for  
589 timely COVID-19 response (93). Another study considered economic evaluation,  
590 community participation, and ethical considerations in priority setting for COVID-19  
591 response (94), and one discussed economic evaluation and evidence synthesis  
592 processes for priority setting across the four stages of pandemic preparedness (95).  
593 Lastly, a study discussed potentially cost-effective control strategies for animal and  
594 zoonotic diseases, including Rift Valley fever, Influenza and Ebola, in pastoralist  
595 populations (29), marking the sole economic study to address CSIDs beyond Ebola  
596 or COVID-19.

597

598 The authors of priority setting studies highlighted several evidence gaps, including  
599 potential barriers to the application of HTAs and challenges stemming from  
600 insufficient collaboration or capacity within the animal sector. Specifically, these gaps  
601 encompassed the complexity of HTAs as a barrier to decision-making (92, 95); a  
602 lack of collaboration resulting in duplicated efforts and resource wastage during the  
603 COVID-19 pandemic (93); limitations in animal disease surveillance and data  
604 maintenance impeding timely outbreak detection; and the absence of a stringent  
605 framework for monitoring the success of animal interventions leading to hesitancy in  
606 investment by institutional donors (29).

607

608 In addition, authors highlighted the need to increase regional capacity and  
609 collaboration while utilising participatory methods to enhance economic benefits and  
610 achieve equitable resource allocation. This would include leveraging strong  
611 leadership with political and institutional support to integrate HTAs into policy-making  
612 and foster regional technical expertise (92) and facilitating collaboration between  
613 designated working groups to prevent duplication of evidence synthesis efforts (30).  
614 Additionally, studies suggested employing mobile phone technologies in near real-  
615 time community-based surveillance systems, integrating multi-disease zoonotic  
616 CSID control approaches to optimise intervention benefit-cost ratios in pastoral areas  
617 (29), and enhancing community participation and expert ethical consideration for  
618 equitable resource allocation during pandemics (94, 95).

| <b>First Author</b>   | <b>Year of publication</b> | <b>Aims</b>                                                                                                                                                                  | <b>CSID(s)</b>     | <b>Relevance to priority setting</b>                                                                                                                                    | <b>Gender-lens</b>       |
|-----------------------|----------------------------|------------------------------------------------------------------------------------------------------------------------------------------------------------------------------|--------------------|-------------------------------------------------------------------------------------------------------------------------------------------------------------------------|--------------------------|
| Anantha-krishnan (92) | 2022                       | Discuss examples of LMICs using HTAs during COVID-19 response and discuss broader HTA.                                                                                       | COVID-19           | Advocates for HTA use in pandemic response through case studies across LMICs.                                                                                           | Gender-specific research |
| Mosam (94)            | 2020                       | Discuss economic evaluation, community participation, and ethical considerations in priority setting of COVID-19 response in South Africa.                                   | COVID-19           | Advocates for development of reliable but rapid processes for resource allocation during pandemic preparedness, highlighting importance of economic evaluation.         | Gender-blind research    |
| Kapiriri (95)         | 2022                       | Discuss how priority setting and resource allocation could be integrated into WHO pandemic preparedness framework to inform COVID-19 pandemic response, with Ebola examples. | Ebola;<br>COVID-19 | Provides a framework for incorporating economics across the WHO pandemic preparedness stages (pre-epidemic preparedness, alert phase, control phase, evaluation phase). | Gender-specific research |
| McCaul (93)           | 2022                       | Discuss COVID-19 Evidence Network to support Decision-making (COVID-                                                                                                         | COVID-19           | Describes COVID-END, a global initiative of 50 evidence synthesis or support groups                                                                                     | Gender-blind research    |

|                  |      |                                                                                                                                                                                                                                              |                                           |                                                                                                                                                                    |                       |
|------------------|------|----------------------------------------------------------------------------------------------------------------------------------------------------------------------------------------------------------------------------------------------|-------------------------------------------|--------------------------------------------------------------------------------------------------------------------------------------------------------------------|-----------------------|
|                  |      | END) body utilising South Africa case study.                                                                                                                                                                                                 |                                           | for generation and communication of trustworthy, rapid, and equitable evidence syntheses to inform clinical and public health decisions and vaccination rollouts.  |                       |
| Zinsstag<br>(29) | 2016 | Address options for cost-effective control of animal disease and zoonoses in pastoral areas, as well as for disease surveillance and the financing of animal health services, utilising case studies in Ethiopia and Eastern/Western Africa. | Influenza;<br>Ebola; Rift<br>Valley fever | Discusses frameworks for evaluating economic efficiency of animal disease control across stages of pandemic preparedness, with a particular focus on surveillance. | Gender-blind research |

620

Abbreviations: HTA: Health Technology Assessment

## 621 **Gender-sensitivity of economic studies**

622 Of the economic studies, 16 were considered gender-blind according to the WHO  
623 intersectionality toolkit (10), and two were gender-specific. Of the gender-specific  
624 studies, one study discussed gender and socioeconomically marginalised groups as  
625 stakeholders that could benefit from HTAs, noting that power dynamics between  
626 groups could limit their inclusion into HTA processes (92). The other gender-specific  
627 study discussed how vulnerability to pandemics could be exacerbated by gender and  
628 socioeconomic status, highlighting the importance of their consideration into  
629 research priorities and resource allocation within pandemic preparedness (95).

630

631 Of the gender -blind studies, two considered other vulnerable groups in the analysis,  
632 focusing on the elderly as high risk to COVID-19 (83) or implementing cost-effective  
633 control strategies against zoonoses in pastoralist communities (29).

634

## 635 **Critical appraisal within sources of evidence**

636 A critical appraisal of evidence was not conducted.

637

## 638 **Discussion**

---

639 We conducted a rapid scoping review to identify research needs for improving  
640 priority setting for pandemic preparedness in sub-Saharan Africa, focusing on data  
641 system and economic studies related to 14 CSIDs with pandemic potential. Our  
642 analysis revealed that while African author involvement is increasing, there remain  
643 few studies led by senior authors from African institutions, underscoring the need for  
644 research funders to support more locally led research efforts. Peer-reviewed

645 economic studies on CSIDs are limited, with most research focusing on COVID-19  
646 and Ebola and originating from South Africa, highlighting a gap in resource allocation  
647 and capacity for other diseases. The high degree of heterogeneity across data  
648 system studies, along with poor data sharing across siloed sectors, indicates a need  
649 for clear data system definitions and guidelines to develop interoperable and  
650 scalable solutions. Additionally, the limited inclusion of gender-sensitive perspectives  
651 in both economic and data system studies points to a significant gap that should be  
652 addressed to ensure more comprehensive and equitable pandemic preparedness  
653 strategies. Taken together, these identified gaps present important opportunities to  
654 enhance priority setting, improve resource allocation, and achieve more equitable  
655 health outcomes across the region.

## 656 **Gaps and opportunities**

657 Studies with all authors affiliated with African institutions were limited throughout the  
658 study period, with the first such study appearing only in 2018. Additionally, the  
659 majority of first authors (69%) and last authors (63%) were affiliated with institutions  
660 outside of Africa. Although our sample size is small, these trends are consistent with  
661 recent research findings on climate change research capacity within the East African  
662 region (96). These regional gaps may indicate a lack of local capacity in data  
663 systems or economic studies. However, they could also reflect global power  
664 dynamics and funding inequalities, where international funders predominantly  
665 support global institutions. This often results in first and last authors being from  
666 outside Africa, potentially leading to research questions and priorities being set  
667 without adequate input from African researchers. Addressing these disparities is  
668 important for fostering a more equitable and effective research environment.

669

670 The concentration of economic studies across COVID-19 and Ebola, and primarily  
671 conducted in South Africa, suggests a broader deficiency in capacity and technical  
672 expertise for conducting similar evaluations across the rest of the WHO AFRO region  
673 and for other CSIDs. This observation is consistent with findings from a previous  
674 review that assessed HTA institutionalisation in sub-Saharan Africa (97), which  
675 highlighted a lack of expertise and tools for context-specific decision-making aligned  
676 with locally agreed frameworks for economic evaluation.

677

678 To address these deficiencies, developing national HTA frameworks that include the  
679 use of context specific economic evaluations could significantly enhance priority-  
680 setting systems (17, 98). These frameworks should incorporate a diverse range of  
681 stakeholder perspectives and extend the usual role of HTAs to address key  
682 questions, such as how to fund or create priority-setting processes that link climate  
683 change and CSID response, and what existing structures support intersectoral  
684 actions for pandemic preparedness. Such country-specific HTA frameworks would  
685 help assess existing resources and could be applied to a range of CSIDs beyond  
686 COVID-19 and Ebola, including emerging threats such as Mpox, which was recently  
687 declared a PHEIC by the WHO (99).

688

689 Additionally, HTA-based priority setting approaches and economic evaluations could  
690 be applied to earlier stages of the pandemic preparedness framework, to assess  
691 prevention and detection strategies. The prominence of COVID-19 studies likely  
692 accounts for most of the identified peer reviewed economic studies focusing on later  
693 stages of pandemic preparedness, due to the epidemiological situation at the time of  
694 publication. Economic evaluations targeting earlier stages, for example on

695 preventing emerging infectious diseases with pandemic potential, could highlight the  
696 benefits of investing in prevention and support the use of financing tools like  
697 Development Impact Bonds, where donors share the risk of investing in high-risk  
698 prevention strategies (29).

699

700 We found a large degree of heterogeneity in data system literature, reflecting a lack  
701 of clear and universally agreed-upon definitions of data systems related to pandemic  
702 preparedness. Establishing these definitions would guide the creation of more  
703 effective data systems that provide decision-makers with accurate and timely  
704 information. For pandemic preparedness against CSIDs, these definitions should  
705 emphasise interoperability and data harmonisation to enable the routine integration  
706 of diverse data sources, such as human health, animal health, and environmental  
707 data.

708

709 Such data systems would enhance data sharing across traditionally siloed sectors,  
710 addressing a significant gap identified by both data system and economic studies in  
711 this review. Sectoral silos and a lack of digital integration platforms are common  
712 barriers to data sharing, which hinder evidence-driven decision-making in a One  
713 Health context (100, 101), despite recommendations from the One Health Joint Plan  
714 of Action (101). The Digital One Health (DOH) framework, based on the FAIR  
715 principles (Findability, Accessibility, Interoperability, and Re-use), aims to address  
716 these barriers by consolidating data-sharing across five key pillars (102). These  
717 pillars focus on harmonising and automating standardisation according to ethical and  
718 legal guidelines, determining which data can be shared, such as pathogen  
719 characteristics and patient gender, or withheld, such as patient name or contact. The



720 framework is currently being piloted in antimicrobial resistance surveillance in  
721 Uganda (100). Tailoring such frameworks to the specific challenges faced across  
722 decision-making in pandemic preparedness could bridge siloed efforts, enhance  
723 coordination, and provide high-quality data for pandemic preparedness decision-  
724 making.

725

726 Limited gender-sensitivity across both data systems and economic studies may  
727 result in inadequate consideration of gender-specific impacts and needs in pandemic  
728 preparedness, despite a growing body of evidence that highlights the differential  
729 effects of pandemics on various genders (7-10). Participatory approaches can  
730 provide methodologies for gender-transformative change, by identifying vulnerable  
731 groups that are context specific and including them into research and subsequent  
732 decision-making (10). Digital participatory methods, such as use of mobile phone  
733 applications for reporting animal cases can facilitate near-real-time reporting of  
734 suspected outbreaks (103), and also help to incorporate hard-to-reach populations  
735 into decision-making processes. Importantly, digital inequities may hinder the  
736 inclusion of marginalised groups, particularly women and girls (9, 103), due to limited  
737 access to technological education (104), especially in low- and middle-income  
738 countries. Therefore, developing participatory digital tools that are culturally and  
739 contextually informed and investing in digital skills for those who need them most,  
740 should be an important consideration for pandemic preparedness.

741

742 We did not find any data system studies that directly attributed human CSID-related  
743 health outcomes to human-caused climate change, despite numerous studies  
744 assessing associations between environmental variables and health outcomes. This

745 reflects a broader gap in attribution research; a recent report identified only 13  
746 studies globally since 2013 that rigorously assessed health impacts attributable to  
747 human-caused climate change (105), with the only CSID study that attributed  
748 human-caused climate change to increased childhood malaria in sub-Saharan Africa  
749 (106). The lack of attribution research on CSIDs is notable, given that the impact of  
750 climate change on CSID-related health outcomes is a priority for attribution research  
751 (105). Enhancing data integration across human, animal, and environmental  
752 domains through interoperable systems could facilitate assessments of long-term  
753 trends and associations, inform counterfactual analyses of climate scenarios, and  
754 support economic evaluations of mitigation and adaptation strategies (107). Such  
755 efforts could significantly strengthen the evidence base on the health impacts of  
756 climate change on CSIDs.

757

## 758 **Limitations**

759 We did not conduct a grey literature search due to the expedited timelines of the  
760 rapid scoping review, likely omitting relevant literature including governmental policy  
761 reports that may describe governmental data-system and economic evaluation use.  
762 To mitigate this limitation, we utilised the expertise of the project steering committee  
763 and their experience across complementary reviews, screening additional studies  
764 they identified as potentially relevant. Secondly, we only included papers published  
765 in English. As a result, an English-language bias may have caused the omission of  
766 studies published by authors from countries where English is not the first language,  
767 the inclusion of which may alter the conclusions drawn. Thirdly, to manage the  
768 number of publications, we only included studies that explicitly mentioned target  
769 CSIDs. This may have excluded some publications relevant to pandemic

770 preparedness of CSIDs in less explicit yet important ways, such as focusing on the  
771 mode of transmission rather than the pathogen or illness. Broadening the scope to  
772 include these studies may provide useful insights into wider data systems or  
773 economic evaluations for pandemic preparedness, such as the use of Natural  
774 Capital Accounting to assess the broader impacts of disease outbreaks on  
775 ecosystem services and public health, which would be excluded unless it explicitly  
776 mentioned a target CSID. Finally, the rapid nature of the review process precluded  
777 in-depth quality assessments of the included studies. Future reviews should  
778 incorporate comprehensive quality appraisals to better understand the reliability and  
779 validity of the evidence base.

780

## 781 **Conclusions**

---

782 Our rapid scoping review revealed significant evidence gaps in data systems and  
783 economics for priority setting of pandemic preparedness in sub-Saharan Africa. Key  
784 issues include limited African-led research, a scarcity of peer-reviewed economic  
785 studies on most CSIDs, inadequate data sharing across human, animal, and  
786 environmental domains, and insufficient application of gender-sensitive perspectives.  
787 Addressing these gaps presents important opportunities to enhance decision-making  
788 in pandemic preparedness and ensure more effective and inclusive responses to  
789 emerging infectious disease threats. This need is especially urgent given the  
790 changing climate, which increases the risk of CSID pandemics, as demonstrated by  
791 the recent Mpox outbreaks.

792

## 793 **Acknowledgements**

794 This work was supported by the International Development Research Centre  
795 (PO5001440). The funders had no role in study design, data collection and analysis,  
796 decision to publish, or preparation of this manuscript. The opinions expressed here  
797 belong to the authors, and do not necessarily reflect those of the funder.

798

## 799 **CRedit author statement**

---

800 **Ellie A. Delight:** Methodology; Formal analysis; Investigation; Data Curation; Writing  
801 - Original Draft; Writing - Review & Editing; Visualization. **Ariel A. Brunn:**  
802 Conceptualization; Methodology; Validation; Investigation; Resources; Writing -  
803 Original Draft; Writing - Review & Editing; Supervision; Project administration;  
804 Funding acquisition. **Francis Ruiz:** Conceptualization; Methodology; Investigation;  
805 Resources; Writing - Original Draft; Writing - Review & Editing. **Jessica Gerard:**  
806 Formal analysis; Investigation; Data Curation; Writing - Original Draft; Writing -  
807 Review & Editing; Visualization. **Jane Falconer:** Methodology; Software; Validation;  
808 Investigation; Data Curation; Writing - Review & Editing. **Yang Liu:**  
809 Conceptualization; Investigation; Writing - Review & Editing. **Bubacarr Bah:**  
810 Conceptualization; Investigation; Writing - Review & Editing. **Bernard Bett:**  
811 Conceptualization; Investigation; Writing - Review & Editing. **Benjamin Uzochukwu:**  
812 Conceptualization; Investigation; Writing - Review & Editing. **Oladeji K. Oloko:**  
813 Conceptualization; Writing - Review & Editing. **Esther Njuguna:** Conceptualization;  
814 Writing - Review & Editing. **Kris A. Murray:** Conceptualization; Methodology;  
815 Validation; Investigation; Writing - Review & Editing; Supervision; Project  
816 administration; Funding acquisition.

817

## 818 **Competing interests**

---

819 FR was supported by funding received from the Bill and Melinda Gates Foundation  
820 (OPP1202541) through the International Decision Support Initiative (iDSI). All other  
821 authors declare that they have no actual or potential competing interests that could  
822 have influenced the work reported herein.

823

## 824 **Supporting information**

---

825 **S1 Table: Screening guidance**

826 **S2 Table: Summary of Design Data system studies**

827 **S3 Table: Summary of Usage Data System studies**

## 828 **References**

- 
- 829 1. Mora C, McKenzie T, Gaw IM, Dean JM, Von Hammerstein H, Knudson TA,  
830 et al. Over half of known human pathogenic diseases can be aggravated by climate  
831 change. *Nature Climate Change*. 2022;12(9):869-75.
- 832 2. Anyamba A, Linthicum KJ, Small JL, Collins KM, Tucker CJ, Pak EW, et al.  
833 Climate Teleconnections and Recent Patterns of Human and Animal Disease  
834 Outbreaks. *PLoS Neglected Tropical Diseases*. 2012;6(1):e1465.
- 835 3. Gibb R, Redding DW, Chin KQ, Donnelly CA, Blackburn TM, Newbold T, et al.  
836 Zoonotic host diversity increases in human-dominated ecosystems. *Nature*.  
837 2020;584(7821):398-402.
- 838 4. Carlson CJ, Albery GF, Merow C, Trisos CH, Zipfel CM, Eskew EA, et al.  
839 Climate change increases cross-species viral transmission risk. *Nature*.  
840 2022;607(7919):555-62.
- 841 5. Wilder-Smith A, Osman S. Public health emergencies of international  
842 concern: a historic overview. *Journal of Travel Medicine*. 2020;27(8).
- 843 6. WHO. Prioritizing diseases for research and development in emergency  
844 contexts. *Prioritizing diseases for research and development in emergency contexts*.  
845 2022.
- 846 7. Dalal J, Triulzi I, James A, Nguimbis B, Dri GG, Venkatasubramanian A, et al.  
847 COVID-19 mortality in women and men in sub-Saharan Africa: a cross-sectional  
848 study. *BMJ Global Health*. 2021;6(11):e007225.
- 849 8. Yeboah H, Yaya S. Health and economic implications of the ongoing  
850 coronavirus disease (COVID-19) pandemic on women and children in Africa. *Reprod*  
851 *Health*. 2023;20(1):70.

- 852 9. Alon T, Doepke M, Olmstead-Rumsey J, Tertilt M. The Impact of COVID-19  
853 on Gender Equality. National Bureau of Economic Research; 2020.
- 854 10. WHO. Incorporating Intersectional Gender Analysis Into Research on  
855 Infectious Diseases of Poverty: A toolkit for health researchers. Geneva; 2020.
- 856 11. Trisos CH, I.O. Adelekan, E. Totin, A. Ayanlade, J. Efitre, A. Gemed, K.  
857 Kalaba, C. Lennard, C. Masao, Y. Mgaya, G. Ngaruiya, D. Olago, N.P. Simpson, S.  
858 Zakieldean. Africa. Climate Change 2022 – Impacts, Adaptation and Vulnerability.  
859 Cambridge, UK and New York, NY, USA: Cambridge University Press; 2023. p.  
860 1285-456.
- 861 12. Africa suffers disproportionately from climate change [press release].  
862 Ghana2023.
- 863 13. Arisco NJ, Sewe MO, Barnighausen T, Sie A, Zabre P, Bunker A. The effect  
864 of extreme temperature and precipitation on cause-specific deaths in rural Burkina  
865 Faso: a longitudinal study. *The Lancet Planetary health*. 2023;7(6):e478-e89.
- 866 14. Zuurmond M, Nyapera V, Mwenda V, Kisia J, Rono H, Palmer J. Childhood  
867 disability in Turkana, Kenya: Understanding how carers cope in a complex  
868 humanitarian setting. *Afr J Disabil*. 2016;5(1):277.
- 869 15. Phillips CA, Caldas A, Cleetus R, Dahl KA, Declet-Barreto J, Licker R, et al.  
870 Compound climate risks in the COVID-19 pandemic. *Nature Climate Change*.  
871 2020;10(7):586-8.
- 872 16. Huber C, Finelli L, Stevens W. The Economic and Social Burden of the 2014  
873 Ebola Outbreak in West Africa. *The Journal of Infectious Diseases*.  
874 2018;218(Supplement\_5):S698-S704.
- 875 17. Ruiz F, Gulliver S, Baker P. iDSI Guide and Reporting Template for HTA  
876 Situational Analyses. iDSI; 2024.

- 877 18. WHO. Ebola and Marburg virus disease epidemics: preparedness, alert,  
878 control, and evaluation. 2014 2014.
- 879 19. Haby MM, Chapman E, Clark R, Barreto J, Reveiz L, Lavis JN. What are the  
880 best methodologies for rapid reviews of the research evidence for evidence-informed  
881 decision-making in health policy and practice: a rapid review. Health Research Policy  
882 and Systems. 2016;14(1):83.
- 883 20. A Protocol for a Scoping Study of Economic and Data System Considerations  
884 for Climate Change and Pandemic Preparedness in Africa [Internet]. Open Science  
885 Framework. 2024.
- 886 21. Brunn AA, Ruiz F, Falconer J, Delight E, Gerard J, Liu Y, et al. A Protocol for  
887 a Scoping Study of Economic and Data System Considerations for Climate Change  
888 and Pandemic Preparedness in Africa. Medrxiv. 2024.
- 889 22. WHO AFRO. Countries 2024 [Available from:  
890 <https://www.afro.who.int/countries>.
- 891 23. Search strategies for "Scoping study of Economic and Data System  
892 Considerations for Climate Change and Pandemic Preparedness in Africa" [Internet].  
893 London School of Hygiene and Tropical Medicine. 2024. Available from:  
894 <https://dx.doi.org/10.17037/DATA.00003769>.
- 895 24. Veritas Health Innovation. Covidence systematic review software. Melbourne,  
896 Australia2024.
- 897 25. Veritas Health Innovation. [cited 2024]. Available from:  
898 [https://www.covidence.org/blog/machine-learning-the-game-changer-for-trustworthy-  
899 evidence/](https://www.covidence.org/blog/machine-learning-the-game-changer-for-trustworthy-evidence/).
- 900 26. Haddaway NR, Page MJ, Pritchard CC, McGuinness LA. PRISMA2020: An R  
901 package and Shiny app for producing PRISMA 2020-compliant flow diagrams, with



- 902 interactivity for optimised digital transparency and Open Synthesis. *Campbell Syst*  
903 *Rev.* 2022;18(2):e1230.
- 904 27. Microsoft Corporation. Microsoft Excel. 2024.
- 905 28. Team R. RStudio: Integrated Development for R. Boston, MA: RStudio; 2020.
- 906 29. Zinsstag J, Abakar MF, Ibrahim M, Tschopp R, Crump L, Bonfoh B, et al.  
907 Cost-effective control strategies for animal and zoonotic diseases in pastoralist  
908 populations. *Revue scientifique et technique (International Office of Epizootics)*.  
909 2016;35(2):673-81.
- 910 30. Pigott DM, Milllear AI, Earl L, Morozoff C, Han BA, Shearer FM, et al. Updates  
911 to the zoonotic niche map of Ebola virus disease in Africa. *eLife*. 2016;5.
- 912 31. Meseko CA, Odurinde OO, Olaniran BO, Heidari A, Oluwayelu DO. Pandemic  
913 influenza A/H1N1 virus incursion into Africa: countries, hosts and phylogenetic  
914 analysis. *Nigerian Veterinary Journal*. 2015;36(3):1251-61.
- 915 32. Lafaye M, Sall B, Ndiaye Y, Vignolles C, Tourre YM, Borchio FO, et al. Rift  
916 Valley fever dynamics in Senegal: a project for pro-active adaptation and  
917 improvement of livestock raising management. *Geospatial health*. 2013;8(1):279-88.
- 918 33. Karimuribo ED, Sayalel K, Beda E, Short N, Wambura P, Mboera LG, et al.  
919 Towards one health disease surveillance: the Southern African Centre for Infectious  
920 Disease Surveillance approach. *The Onderstepoort journal of veterinary research*.  
921 2012;79(2):454.
- 922 34. Liebenberg L, Steventon J, Brahman I, Benadie K, Minye J, Langwane H, et  
923 al. Smartphone Icon User Interface design for non-literate trackers and its  
924 implications for an inclusive citizen science. *Biological Conservation*. 2017;208:155-  
925 62.

- 926 35. Tourre YM, Lacaux JP, Vignolles C, Ndione JA, Lafaye M, editors. Rift Valley  
927 Fever (RVF) risks in Senegal using high-resolution remote sensing2010; Kyoto,  
928 JAPAN.
- 929 36. Guenin M-J, De Nys HM, Peyre M, Loire E, Thongyuan S, Diallo A, et al. A  
930 participatory epidemiological and One Health approach to explore the community's  
931 capacity to detect emerging zoonoses and surveillance network opportunities in the  
932 forest region of Guinea. PLoS neglected tropical diseases. 2022;16(7):e0010462.
- 933 37. Baldassi F, Cenciarelli O, Malizia A, Gaudio P. First Prototype of the  
934 Infectious Diseases Seeker (IDS) Software for Prompt Identification of Infectious  
935 Diseases. Journal of epidemiology and global health. 2020;10(4):367-77.
- 936 38. Oyas H, Holmstrom L, Kemunto NP, Muturi M, Mwatondo A, Osoro E, et al.  
937 Enhanced surveillance for Rift Valley Fever in livestock during El Nino rains and  
938 threat of RVF outbreak, Kenya, 2015-2016. PLoS neglected tropical diseases.  
939 2018;12(4):e0006353.
- 940 39. Zhao HQ, Fei SW, Yin JX, Li Q, Jiang TG, Guo ZY, et al. Assessment of  
941 performance for a key indicator of One Health: evidence based on One Health index  
942 for zoonoses in Sub-Saharan Africa. Infectious Diseases of Poverty. 2022;11(1):109.
- 943 40. Ramadan OPC, Berta KK, Wamala JF, Maleghemi S, Rumunu J, Ryan C, et  
944 al. Analysis of the 2017-2018 Rift valley fever outbreak in Yirol East County, South  
945 Sudan: a one health perspective. The Pan African medical journal. 2022;42(Suppl  
946 1):5.
- 947 41. Massengo NRB, Tinto B, Simonin Y. One health approach to arbovirus control  
948 in Africa: interests, challenges, and difficulties. Microorganisms. 2023;11(6).

- 949 42. Burke RL, Kronmann KC, Daniels CC, Meyers M, Byarugaba DK, Dueger E,  
950 et al. A review of zoonotic disease surveillance supported by the Armed Forces  
951 Health Surveillance Center. *Zoonoses and public health*. 2012;59(3):164-75.
- 952 43. Goutard FL, Binot A, Duboz R, Rasamoelina-Andriamanivo H, Pedrono M,  
953 Holl D, et al. How to reach the poor? Surveillance in low-income countries, lessons  
954 from experiences in Cambodia and Madagascar. *Preventive Veterinary Medicine*.  
955 2015;120(1):12-26.
- 956 44. Zimmerman DM, Mitchell SL, Wolf TM, Deere JR, Noheri JB, Takahashi E, et  
957 al. Great ape health watch: enhancing surveillance for emerging infectious diseases  
958 in great apes. *Special Issue: One health*. 2022;84(4/5).
- 959 45. Witt CJ, Richards AL, Masuoka PM, Foley DH, Buczak AL, Musila LA, et al.  
960 The AFHSC-Division of GEIS Operations Predictive Surveillance Program: a  
961 multidisciplinary approach for the early detection and response to disease outbreaks.  
962 *BMC public health*. 2011;11 Suppl 2:S10.
- 963 46. Abayomi A, Balogun MR, Bankole M, Banke-Thomas A, Mutiu B, Olawepo J,  
964 et al. From Ebola to COVID-19: emergency preparedness and response plans and  
965 actions in Lagos, Nigeria. *Global Health*. 2021;17(1):79.
- 966 47. Hassan OA, Ahlm C, Evander M. A need for one health approach-lessons  
967 learned from outbreaks of Rift Valley fever in Saudi Arabia and Sudan. *Infection*  
968 *Ecology and Epidemiology*. 2014;4(1):20710.
- 969 48. Holmes EC, Rambaut A, Andersen KG. Pandemics: Spend on surveillance,  
970 not prediction comment. *Nature*. 2018;558(7709):180-2.
- 971 49. Tambo E, Adetunde OT, Olalubi OA. Re-emerging Lassa fever outbreaks in  
972 Nigeria: Re-enforcing "One Health" community surveillance and emergency  
973 response practice. *Infectious diseases of poverty*. 2018;7(1):37.

- 974 50. McKendrick JQ, Tennant WSD, Tildesley MJ. Modelling seasonality of Lassa  
975 fever incidences and vector dynamics in Nigeria. PLoS neglected tropical diseases.  
976 2023;17(11):e0011543.
- 977 51. Olayemi A, Adesina AS, Strecker T, Magassouba NF, Fichet-Calvet E.  
978 Determining Ancestry between Rodent- and Human-Derived Virus Sequences in  
979 Endemic Foci: Towards a More Integral Molecular Epidemiology of Lassa Fever  
980 within West Africa. Biology. 2020;9(2).
- 981 52. Arsevska E, Hellal J, Mejri S, Hammami S, Marianneau P, Calavas D, et al.  
982 Identifying Areas Suitable for the Occurrence of Rift Valley Fever in North Africa:  
983 Implications for Surveillance. Transboundary and emerging diseases.  
984 2016;63(6):658-74.
- 985 53. Bogoch II, Brady OJ, Kraemer MUG, German M, Creatore MI, Brent S, et al.  
986 Potential for Zika virus introduction and transmission in resource-limited countries in  
987 Africa and the Asia-Pacific region: a modelling study. The Lancet Infectious  
988 Diseases. 2016;16(11):1237-45.
- 989 54. Brown M, Moore L, McMahon B, Powell D, Labute M, Hyman JM, et al.  
990 Constructing Rigorous and Broad Biosurveillance Networks for Detecting Emerging  
991 Zoonotic Outbreaks. PLOS ONE. 2015;10(5):e0124037.
- 992 55. Guilloteau C, Gosset M, Vignolles C, Alcoba M, Tourre YM, Lacaux J-P.  
993 Impacts of Satellite-Based Rainfall Products on Predicting Spatial Patterns of Rift  
994 Valley Fever Vectors\*. Journal of Hydrometeorology. 2014;15(4):1624-35.
- 995 56. Jagadesh S, Combe M, Nacher M, Gozlan R. In search for the hotspots of  
996 Disease X: A biogeographic approach to mapping the predictive risk of WHO's  
997 blueprint priority diseases. International Journal of Infectious Diseases.  
998 2020;101(Supplement 1):220.

- 999 57. Mahama PNJ, Kabo-Bah AT, Blanford JI, Yamba EI, Antwi-Agyei P.  
1000 Reviewing the Past, Present, and Future Risks of Pathogens in Ghana and What  
1001 This Means for Rethinking Infectious Disease Surveillance for Sub-Saharan Africa.  
1002 Journal of Tropical Medicine. 2022;2022:4589007.
- 1003 58. Nyakarahuka L, Ayebare S, Mosomtai G, Kankya C, Lutwama J, Mwiine FN,  
1004 et al. Ecological Niche Modeling for Filoviruses: A Risk Map for Ebola and Marburg  
1005 Virus Disease Outbreaks in Uganda. PLoS currents. 2017;9.
- 1006 59. Ochieng AO, Nanyingi M, Kipruto E, Ondiba IM, Amimo FA, Oludhe C, et al.  
1007 Ecological niche modelling of Rift Valley fever virus vectors in Baringo, Kenya.  
1008 Infection ecology & epidemiology. 2016;6:32322.
- 1009 60. Pigott D, Golding N, Mylne A, Huang Z, Henry A, Weiss D, et al. Mapping the  
1010 Zoonotic niche of Ebola virus disease in Africa. American Journal of Tropical  
1011 Medicine and Hygiene. 2014;91(5 SUPPL. 1):590.
- 1012 61. Simons D, Attfield LA, Jones KE, Watson-Jones D, Kock R. Rodent trapping  
1013 studies as an overlooked information source for understanding endemic and novel  
1014 zoonotic spillover. PLoS Neglected Tropical Diseases. 2023;17(1):e0010772.
- 1015 62. Aidoo EN, Adebajji AO, Awashie GE, Appiah SK. The effects of weather on  
1016 the spread of COVID-19: evidence from Ghana. Bulletin of the National Research  
1017 Centre. 2021;45(1):20.
- 1018 63. Anyamba A, Damoah R, Kemp A, Small JL, Rostal MK, Bagge W, et al.  
1019 Climate Conditions During a Rift Valley Fever Post-epizootic Period in Free State,  
1020 South Africa, 2014-2019. Frontiers in veterinary science. 2021;8:730424.
- 1021 64. Anyamba A, Small JL, Britch SC, Tucker CJ, Pak EW, Reynolds CA, et al.  
1022 Recent weather extremes and impacts on agricultural production and vector-borne  
1023 disease outbreak patterns. PLOS ONE. 2014;9(3):e92538.

- 1024 65. Azziz-Baumgartner E, Dao C, Nasreen S, Bhuiyan MU, Munir ME, Al Mamun  
1025 A, et al. Seasonality, timing, and climate drivers of influenza activity worldwide.  
1026 American Journal of Tropical Medicine and Hygiene. 2011;85(6 SUPPL. 1):427.
- 1027 66. Boufekane A, Busico G, Maizi D. Effects of temperature and relative humidity  
1028 on the COVID-19 pandemic in different climates: a study across some regions in  
1029 Algeria (North Africa). Environmental Science and Pollution Research.  
1030 2021;29(12):18077-102.
- 1031 67. Cambaza EM, Viegas GC, Cambaza CM. Potential impact of temperature and  
1032 atmospheric pressure on the number of cases of COVID-19 in Mozambique,  
1033 Southern Africa. Journal of Public Health and Epidemiology. 2020;12(3):246-60.
- 1034 68. Diouf I, Sy S, Senghor H, Fall P, Diouf D, Diakhate M, et al. Potential  
1035 Contribution of Climate Conditions on COVID-19 Pandemic Transmission over West  
1036 and North African Countries. Atmosphere. 2022;13(1).
- 1037 69. Meo SA, Abukhalaf AA, Alomar AA, Al-Beeshi IZ, Alhowikan A, Shafi KM, et  
1038 al. Climate and COVID-19 pandemic: effect of heat and humidity on the incidence  
1039 and mortality in world's top ten hottest and top ten coldest countries. European  
1040 review for medical and pharmacological sciences. 2020;24(15):8232-8.
- 1041 70. Pana TA, Bhattacharya S, Gamble DT, Pasdar Z, Szlachetka WA, Perdomo-  
1042 Lampignano JA, et al. Country-level determinants of the severity of the first global  
1043 wave of the COVID-19 pandemic: an ecological study. BMJ open.  
1044 2021;11(2):e042034.
- 1045 71. Arruda LB, Free HB, Simons D, Ansumana R, Elton L, Haider N, et al. Current  
1046 sampling and sequencing biases of Lassa mammarenavirus limit inference from  
1047 phylogeography and molecular epidemiology in Lassa fever endemic regions. PLOS  
1048 global public health. 2023;3(11):e0002159.

- 1049 72. Chan JM, Rabadan R. Quantifying pathogen surveillance using temporal  
1050 genomic data. *mBio*. 2013;4(1):e00524-12.
- 1051 73. Fuller T, Thomassen HA, Mulembakani PM, Johnston SC, Lloyd-Smith JO,  
1052 Kisalu NK, et al. Using remote sensing to map the risk of human monkeypox virus in  
1053 the Congo Basin. *EcoHealth*. 2011;8(1):14-25.
- 1054 74. Glancey MM, Anyamba A, Linthicum KJ. Epidemiologic and Environmental  
1055 Risk Factors of Rift Valley Fever in Southern Africa from 2008 to 2011. *Vector borne  
1056 and zoonotic diseases (Larchmont, NY)*. 2015;15(8):502-11.
- 1057 75. Walsh MG, Amstislavski P, Greene A, Haseeb MA. The landscape  
1058 epidemiology of seasonal clustering of highly pathogenic avian influenza (H5N1) in  
1059 domestic poultry in Africa, Europe and Asia. *Transboundary and Emerging Diseases*.  
1060 2017;64(5):1465-78.
- 1061 76. Lo Iacono G, Cunningham AA, Bett B, Grace D, Redding DW, Wood JLN.  
1062 Environmental limits of Rift Valley fever revealed using ecoepidemiological  
1063 mechanistic models. *Proceedings of the National Academy of Sciences of the United  
1064 States of America*. 2018;115(31):E7448-E56.
- 1065 77. Mosomtai G, Evander M, Sandstrom P, Ahlm C, Sang R, Hassan OA, et al.  
1066 Association of ecological factors with Rift Valley fever occurrence and mapping of  
1067 risk zones in Kenya. *International journal of infectious diseases : IJID : official  
1068 publication of the International Society for Infectious Diseases*. 2016;46:49-55.
- 1069 78. Ameh Yaro C, Udama Eneche PS, Abu Anyebe D. Risk analysis and hot  
1070 spots detection of SARS-CoV-2 in Nigeria using demographic and environmental  
1071 variables: an early assessment of transmission dynamics. *International journal of  
1072 environmental health research*. 2022;32(5):1111-22.

- 1073 79. Reddy KP, Fitzmaurice KP, Scott JA, Harling G, Lessells RJ, Panella C, et al.  
1074 Clinical outcomes and cost-effectiveness of COVID-19 vaccination in South Africa.  
1075 Nat Commun. 2021;12(1):6238.
- 1076 80. Ruiz FJ, Torres-Rueda S, Pearson CAB, Bergren E, Okeke C, Procter SR, et  
1077 al. What, how and who: Cost-effectiveness analyses of COVID-19 vaccination to  
1078 inform key policies in Nigeria. PLOS Glob Public Health. 2023;3(3):e0001693.
- 1079 81. Liu Y, Pearson CAB, Montero AM, Torres-Rueda S, Asfaw E, Uzochukwu B,  
1080 et al. Assessing the impacts of timing on the health benefits, cost-effectiveness and  
1081 relative affordability of COVID-19 vaccination programmes in 27 African Countries.  
1082 medRxiv; 2022.
- 1083 82. Obeng-Kusi M, Erstad B, Roe DJ, Abraham I. Comparative value-based  
1084 pricing of an Ebola vaccine in resource-constrained countries based on cost-  
1085 effectiveness analysis. J Med Econ. 2022;25(1):894-902.
- 1086 83. Orangi S, Ojal J, Brand SP, Orlando C, Kairu A, Aziza R, et al.  
1087 Epidemiological impact and cost-effectiveness analysis of COVID-19 vaccination in  
1088 Kenya. BMJ Global Health. 2022;7(8):e009430.
- 1089 84. Reddy KP, Shebl FM, Foote JHA, Harling G, Scott JA, Panella C, et al. Cost-  
1090 effectiveness of public health strategies for COVID-19 epidemic control in South  
1091 Africa: a microsimulation modelling study. The Lancet Global Health.  
1092 2021;9(2):e120-e9.
- 1093 85. Asamoah JKK, Owusu MA, Jin Z, Oduro FT, Abidemi A, Gyasi EO. Global  
1094 stability and cost-effectiveness analysis of COVID-19 considering the impact of the  
1095 environment: using data from Ghana. Chaos, solitons, and fractals.  
1096 2020;140:110103.



- 1097 86. Kellerborg K, Brouwer W, van Baal P. Costs and benefits of early response in  
1098 the Ebola virus disease outbreak in Sierra Leone. *Cost Effectiveness and Resource*  
1099 *Allocation*. 2020;18(1):13.
- 1100 87. Kairu A, Were V, Isaaka L, Agweyu A, Aketch S, Barasa E. Modelling the  
1101 cost-effectiveness of essential and advanced critical care for COVID-19 patients in  
1102 Kenya. *BMJ Global Health*. 2021;6(12):e007168.
- 1103 88. Beshah SA, Zeru A, Tadele W, Defar A, Getachew T, Fekadu Assebe L. A  
1104 cost-effectiveness analysis of COVID-19 critical care interventions in Addis Ababa,  
1105 Ethiopia: a modeling study. *Cost effectiveness and resource allocation : C/E*.  
1106 2023;21(1):40.
- 1107 89. Nonvignon J, Owusu R, Asare B, Adjagba A, Aun YW, Yeung KHT, et al.  
1108 Estimating the cost of COVID-19 vaccine deployment and introduction in Ghana  
1109 using the CVIC tool. *Vaccine*. 2022;40(12):1879-87.
- 1110 90. Mergenthaler C, Van Den Broek A, Bakker M, Tromp N, Nehal K, Jansen J, et  
1111 al. Feasibility and challenges in sustaining a community based surveillance system  
1112 in Post-Ebola Sierra Leone. *Tropical Medicine and International Health*.  
1113 2021;26(SUPPL 1):117-8.
- 1114 91. Carias C, Adhikari BB, Ravat F, Meltzer MI, Marston BJ. Resources needed  
1115 for US CDC's support to the response to post-epidemic clusters of Ebola in West  
1116 Africa, 2016. *Infectious Diseases of Poverty*. 2018;7(1):113.
- 1117 92. Ananthakrishnan A, Luz ACG, Kc S, Ong L, Oh C, Isaranuwachai W, et al.  
1118 How can health technology assessment support our response to public health  
1119 emergencies? *Health Research Policy and Systems*. 2022;20(1):124.
- 1120 93. McCaul M, Tovey D, Young T, Welch V, Dewidar O, Goetghebeur M, et al.  
1121 Resources supporting trustworthy, rapid and equitable evidence synthesis and

- 1122 guideline development: results from the COVID-19 evidence network to support  
1123 decision-making (COVID-END). *J Clin Epidemiol.* 2022;151:88-95.
- 1124 94. Mosam A, Goldstein S, Erzse A, Tugendhaft A, Hofman K. Building trust  
1125 during COVID 19: Value-driven and ethical priority-setting. *S Afr Med J.*  
1126 2020;110(6):443-4.
- 1127 95. Kapiriri L, Essue B, Bwire G, Nouvet E, Kiwanuka S, Sengooba F, et al. A  
1128 framework to support the integration of priority setting in the preparedness, alert,  
1129 control and evaluation stages of a disease pandemic. *Glob Public Health.*  
1130 2022;17(8):1479-91.
- 1131 96. Gerard J, Kibaara T, Blom IM, Falconer J, Mohammed S, Kadri-Alabi Z, et al.  
1132 Climate-Sensitive Health Outcomes in Kenya: A Scoping Review of Environmental  
1133 Exposures and Health Outcomes Research, 2000 – 2023. 2024.
- 1134 97. Hollingworth S, Fenny AP, Yu S-Y, Ruiz F, Chalkidou K. Health technology  
1135 assessment in sub-Saharan Africa: a descriptive analysis and narrative synthesis.  
1136 *Cost Effectiveness and Resource Allocation.* 2021;19(1).
- 1137 98. Chola LB, Edwine; Mbau, Rahab; Baker, Pete. *iDSI Guide and Template for*  
1138 *Developing a National Framework for Health Technology Assessment.* Center for  
1139 *Global Development;* 2023.
- 1140 99. WHO Director-General declares mpox outbreak a public health emergency of  
1141 international concern [press release]. 14/08/2024 2024.
- 1142 100. Redman-White CJ, Loosli K, Qarkaxhija V, Lee TN, Mboowa G, Wee BA, et  
1143 al. A Digital One Health framework to integrate data for public health decision-  
1144 making. *IJID One Health.* 2023;1.

- 1145 101. FAO., UNEP., WHO., WOA. One. Health Joint Plan of Action, 2022–2026:  
1146 working together for the health of humans, animals, plants and the environment.  
1147 Rome, Italy; 2022.
- 1148 102. Wilkinson MD, Dumontier M, Aalbersberg IJ, Appleton G, Axton M, Baak A, et  
1149 al. The FAIR Guiding Principles for scientific data management and stewardship.  
1150 Scientific Data. 2016;3(1):160018.
- 1151 103. Tan Y-R, Agrawal A, Matsoso MP, Katz R, Davis SLM, Winkler AS, et al. A  
1152 call for citizen science in pandemic preparedness and response: beyond data  
1153 collection. BMJ Global Health. 2022;7(6):e009389.
- 1154 104. Davis S, Were N, Imalingat T. DIGITAL HEALTH RIGHTS: INITIAL  
1155 ANALYSIS. Graduate Institute Geneva; 2021.
- 1156 105. Trust W. Detection and Attribution of Climate Change Impacts on Human  
1157 Health: A Data Science Framework. 2024.
- 1158 106. Carlson CJ, Carleton TA, Odoulami RC, Trisos CH. The historical fingerprint  
1159 and future impact of climate change on childhood malaria in Africa. 2023.
- 1160 107. Change IPoC. Detection and Attribution of Climate Change: from Global to  
1161 Regional. In: Press CU, editor. Climate Change 2013 – The Physical Science Basis:  
1162 Working Group I Contribution to the Fifth Assessment Report of the  
1163 Intergovernmental Panel on Climate Change 2014. p. 867-952.
- 1164 108. World Health O. Economic evaluation & analysis. 2024.
- 1165 109. Koon AD, Windmeyer L, Bigdeli M, Charles J, El Jardali F, Uneke J, et al. A  
1166 scoping review of the uses and institutionalisation of knowledge for health policy in  
1167 low- and middle-income countries. Health Research Policy and Systems.  
1168 2020;18(1):7.

- 1169 110. NHS England. Data Sets [Available from: [https://digital.nhs.uk/data-and-](https://digital.nhs.uk/data-and-information/data-collections-and-data-sets/data-sets)
- 1170 [information/data-collections-and-data-sets/data-sets](https://digital.nhs.uk/data-and-information/data-collections-and-data-sets/data-sets).
- 1171 111. Mooney SJ, Garber MD. Sampling and Sampling Frames in Big Data
- 1172 Epidemiology. Curr Epidemiol Rep. 2019;6(1):14-22.
- 1173

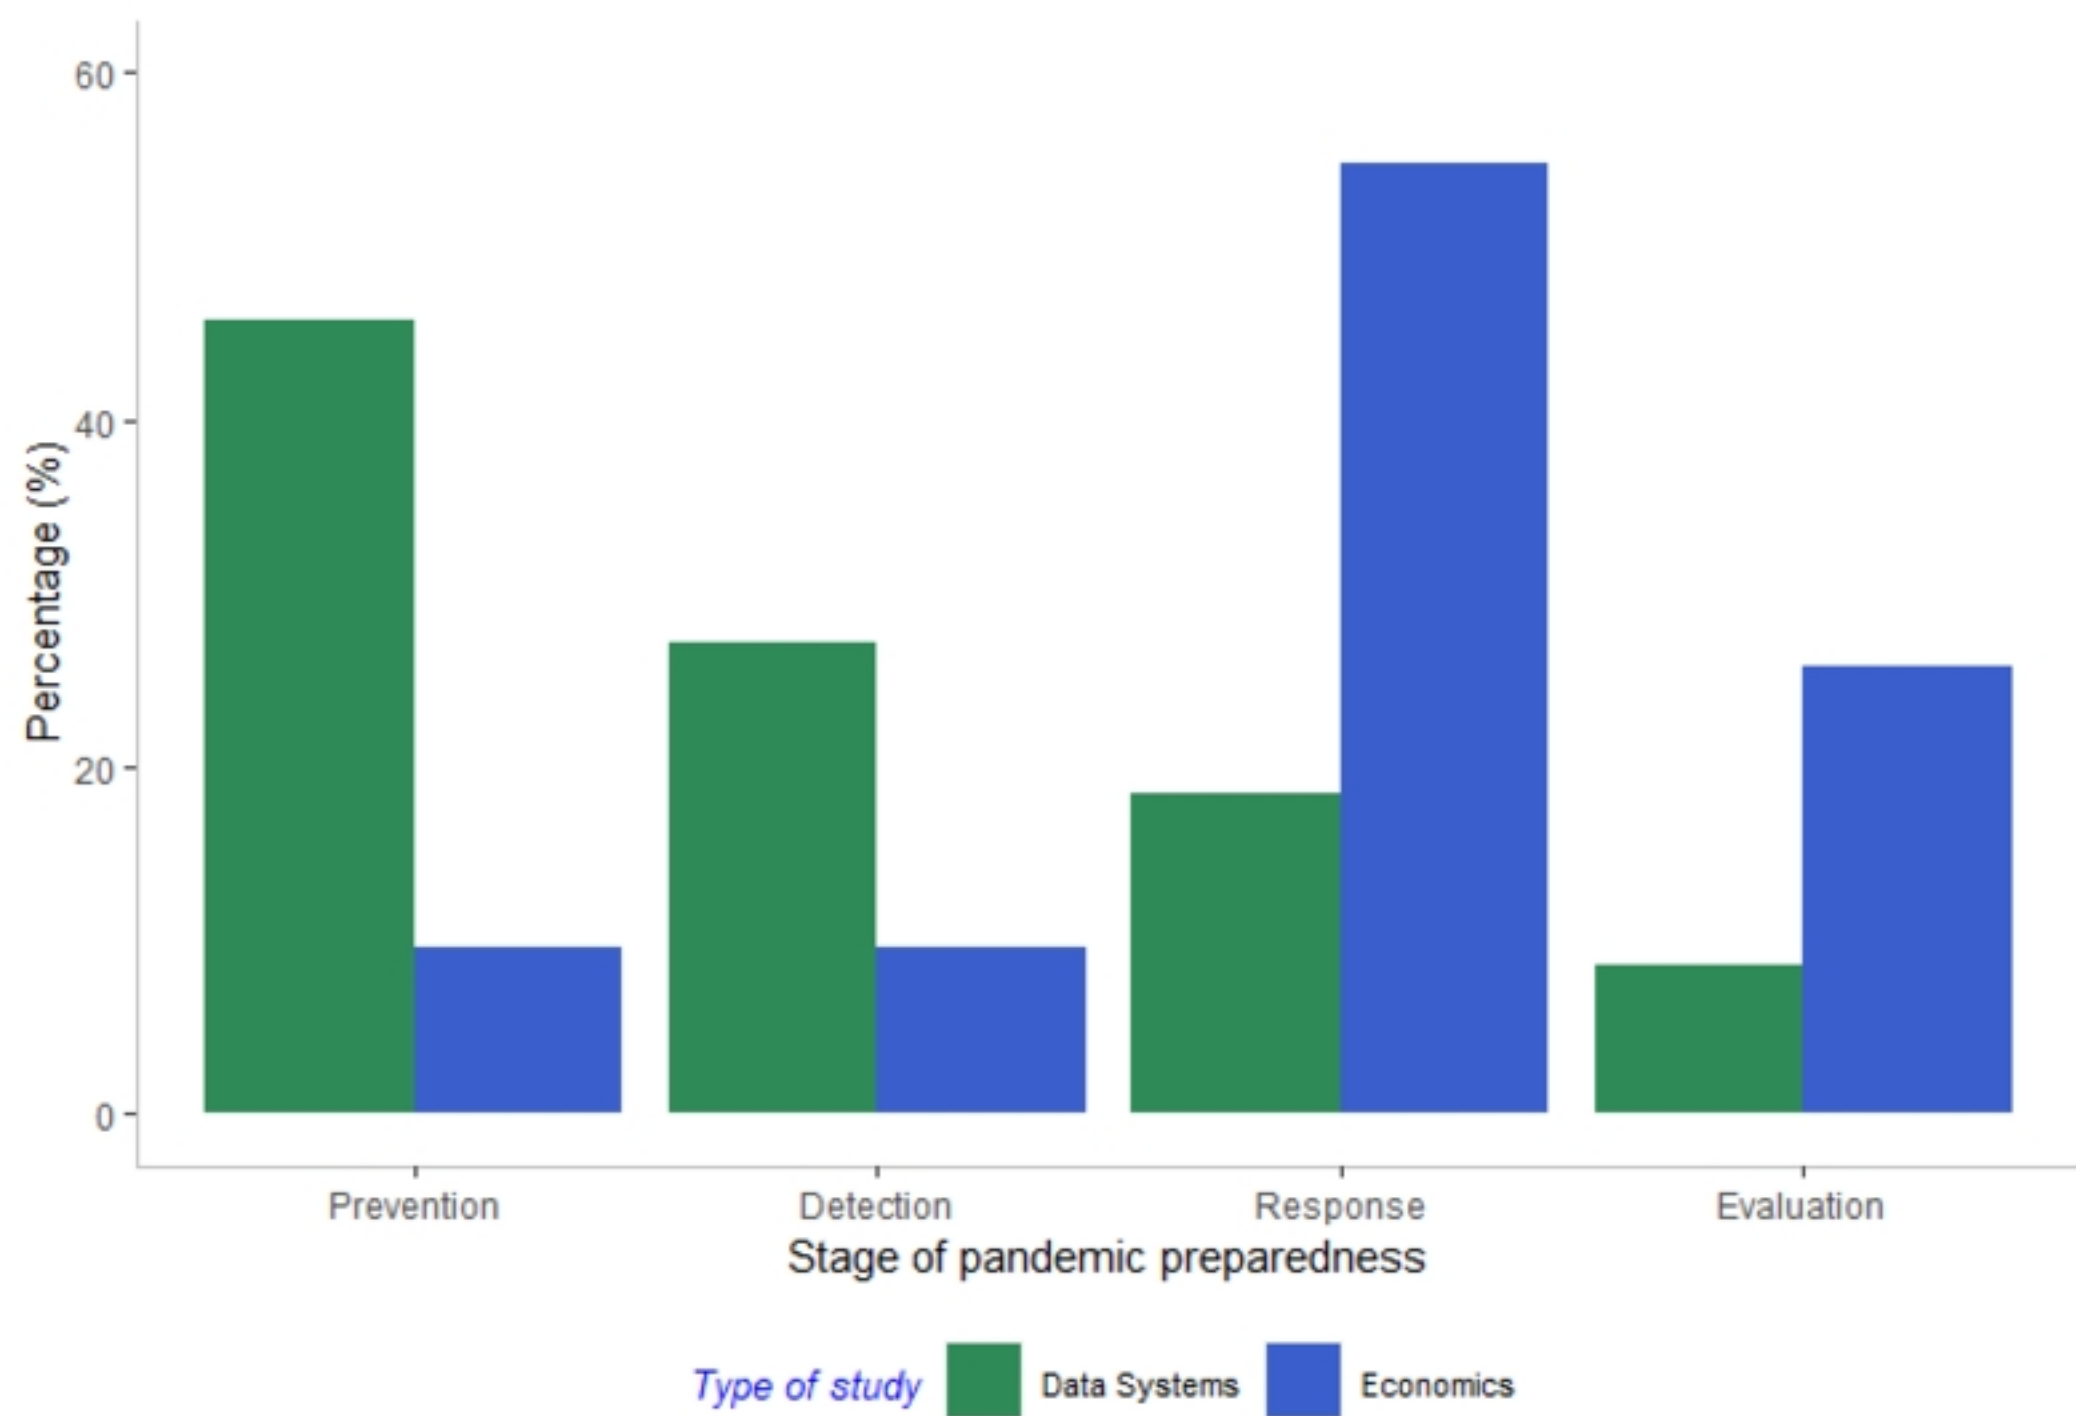

Fig6

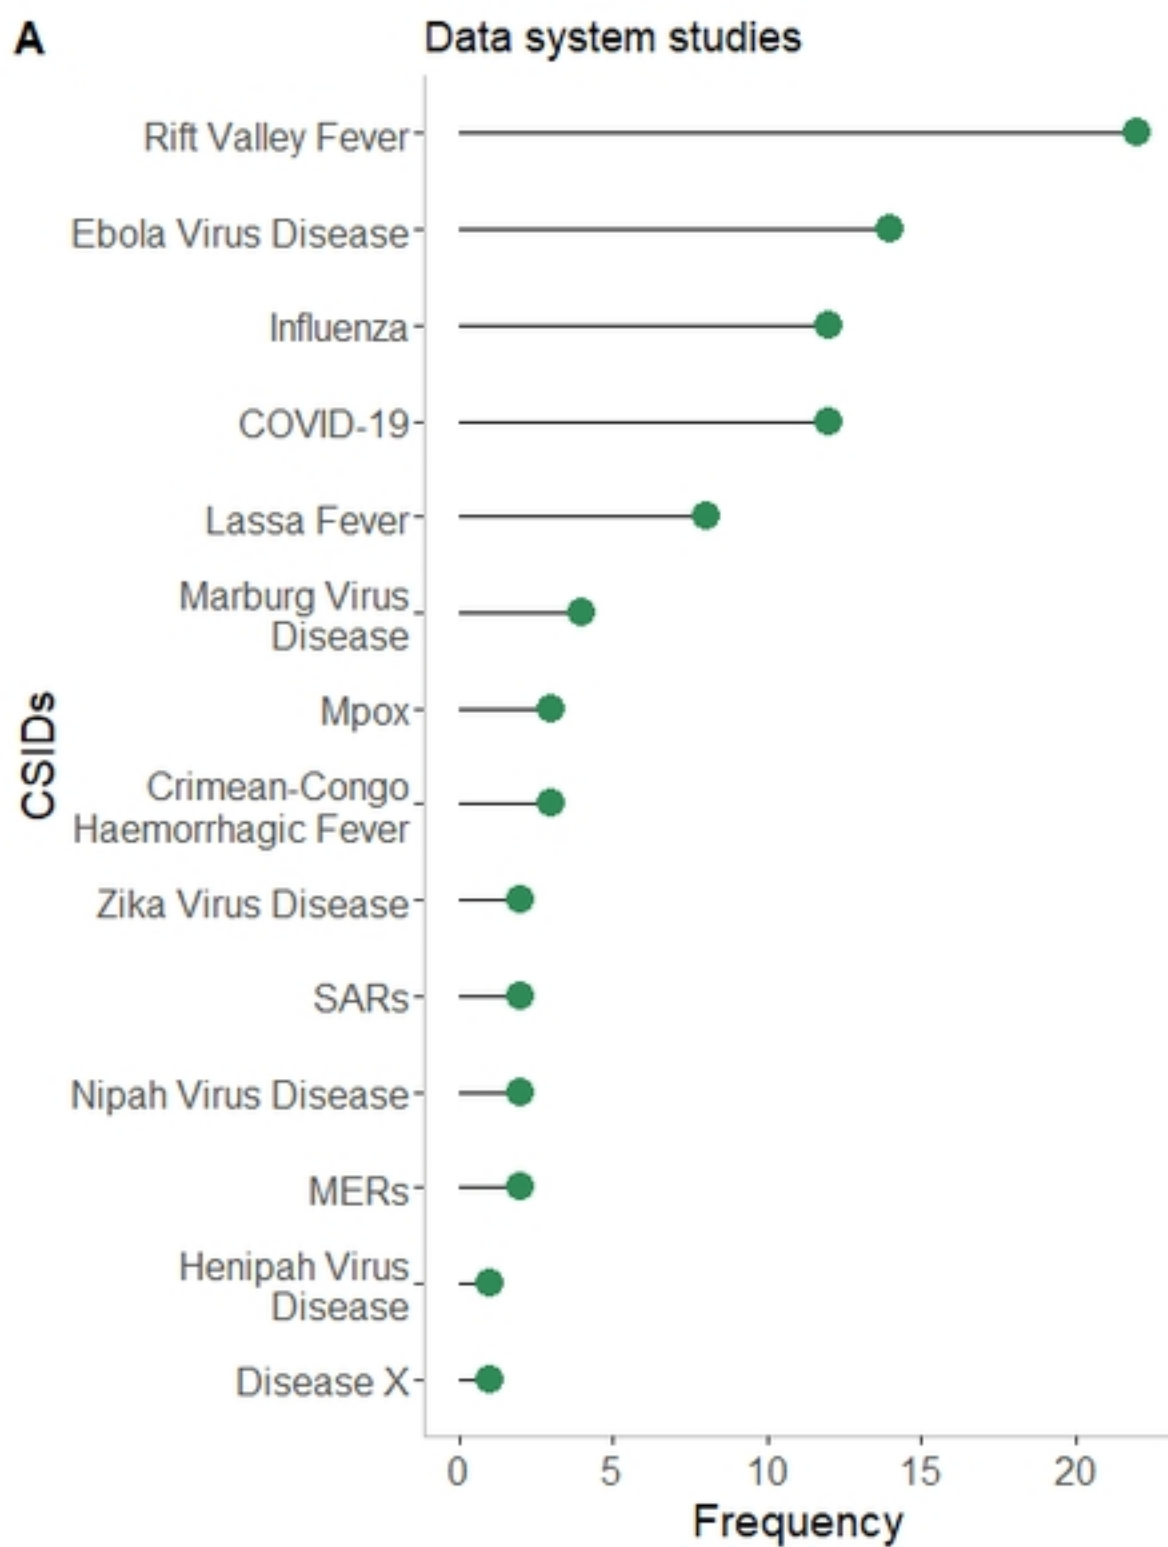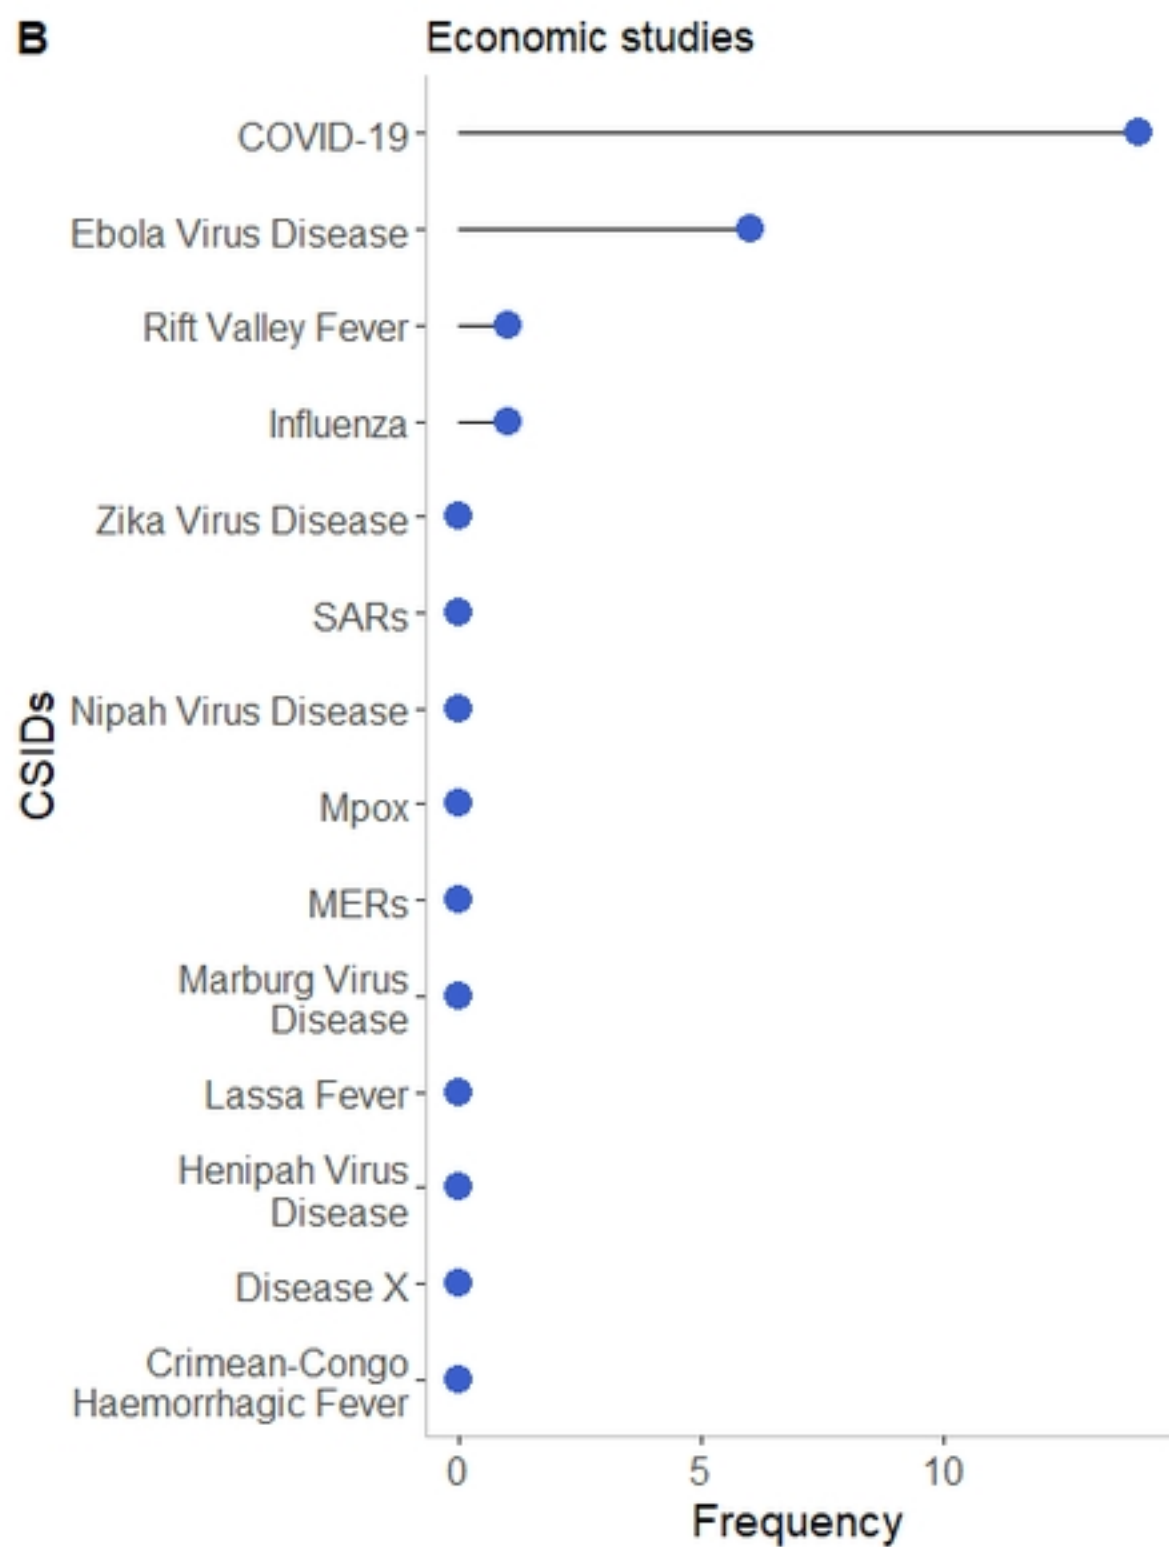

Fig7

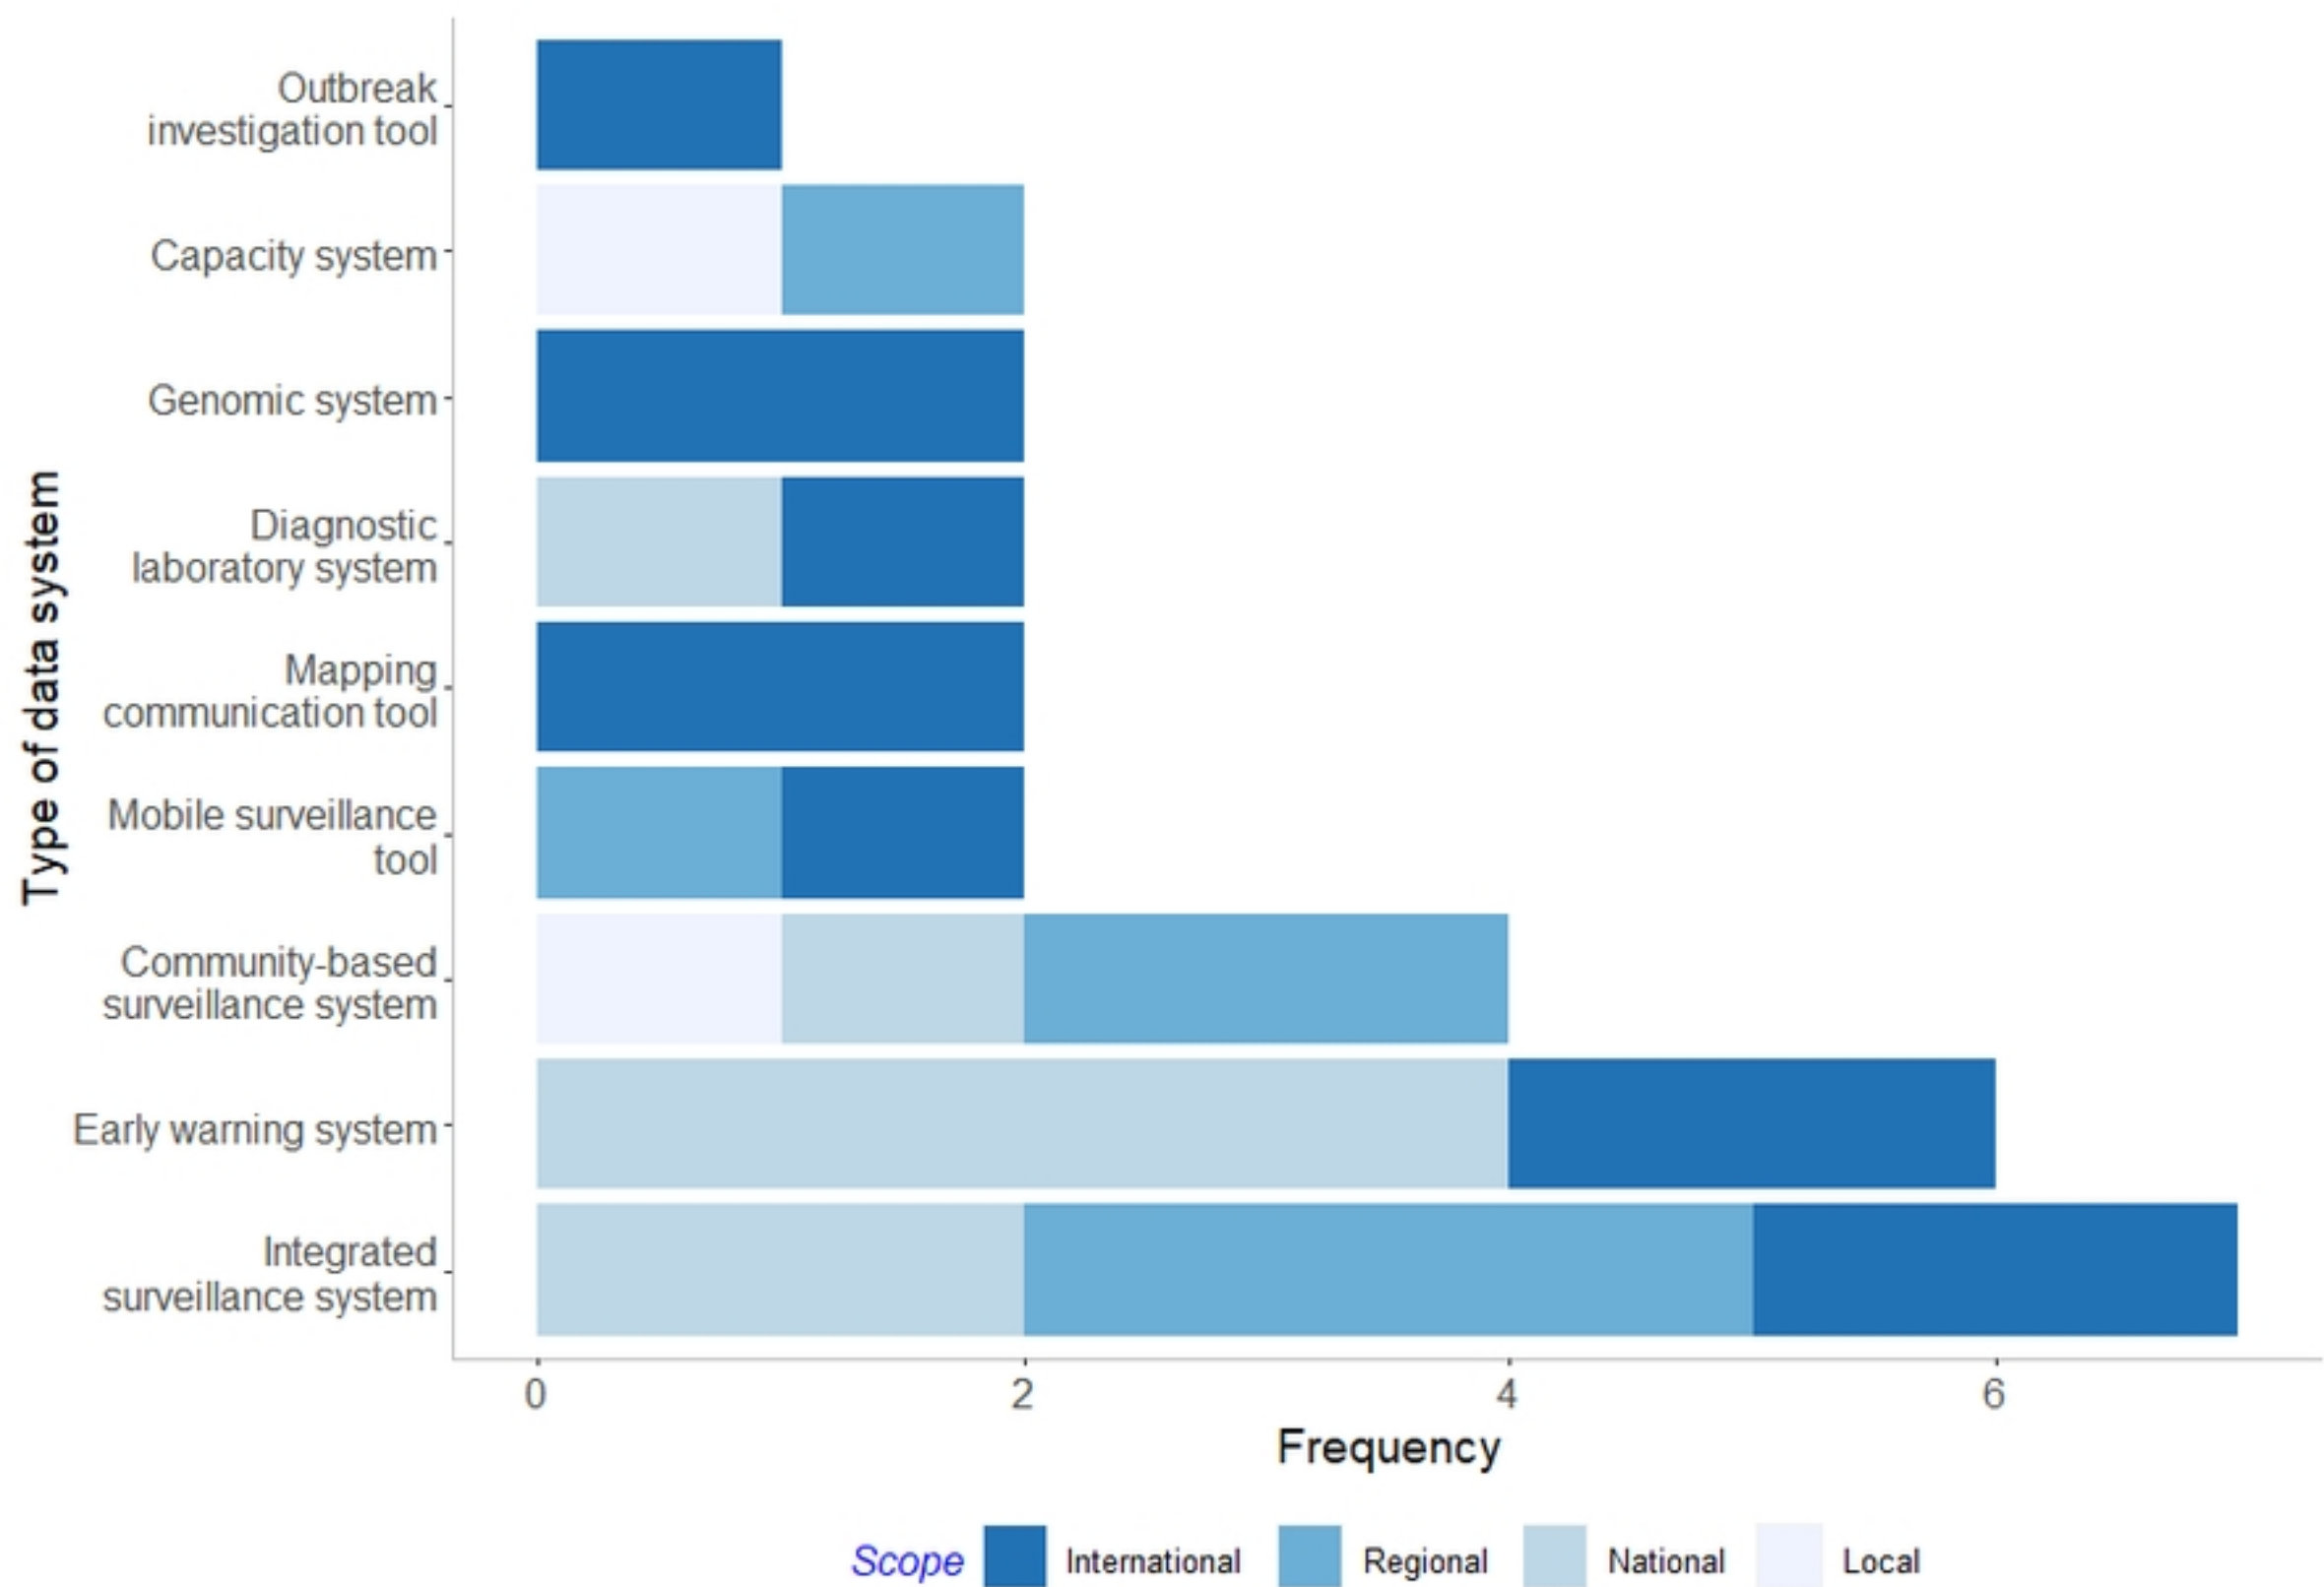

Fig8

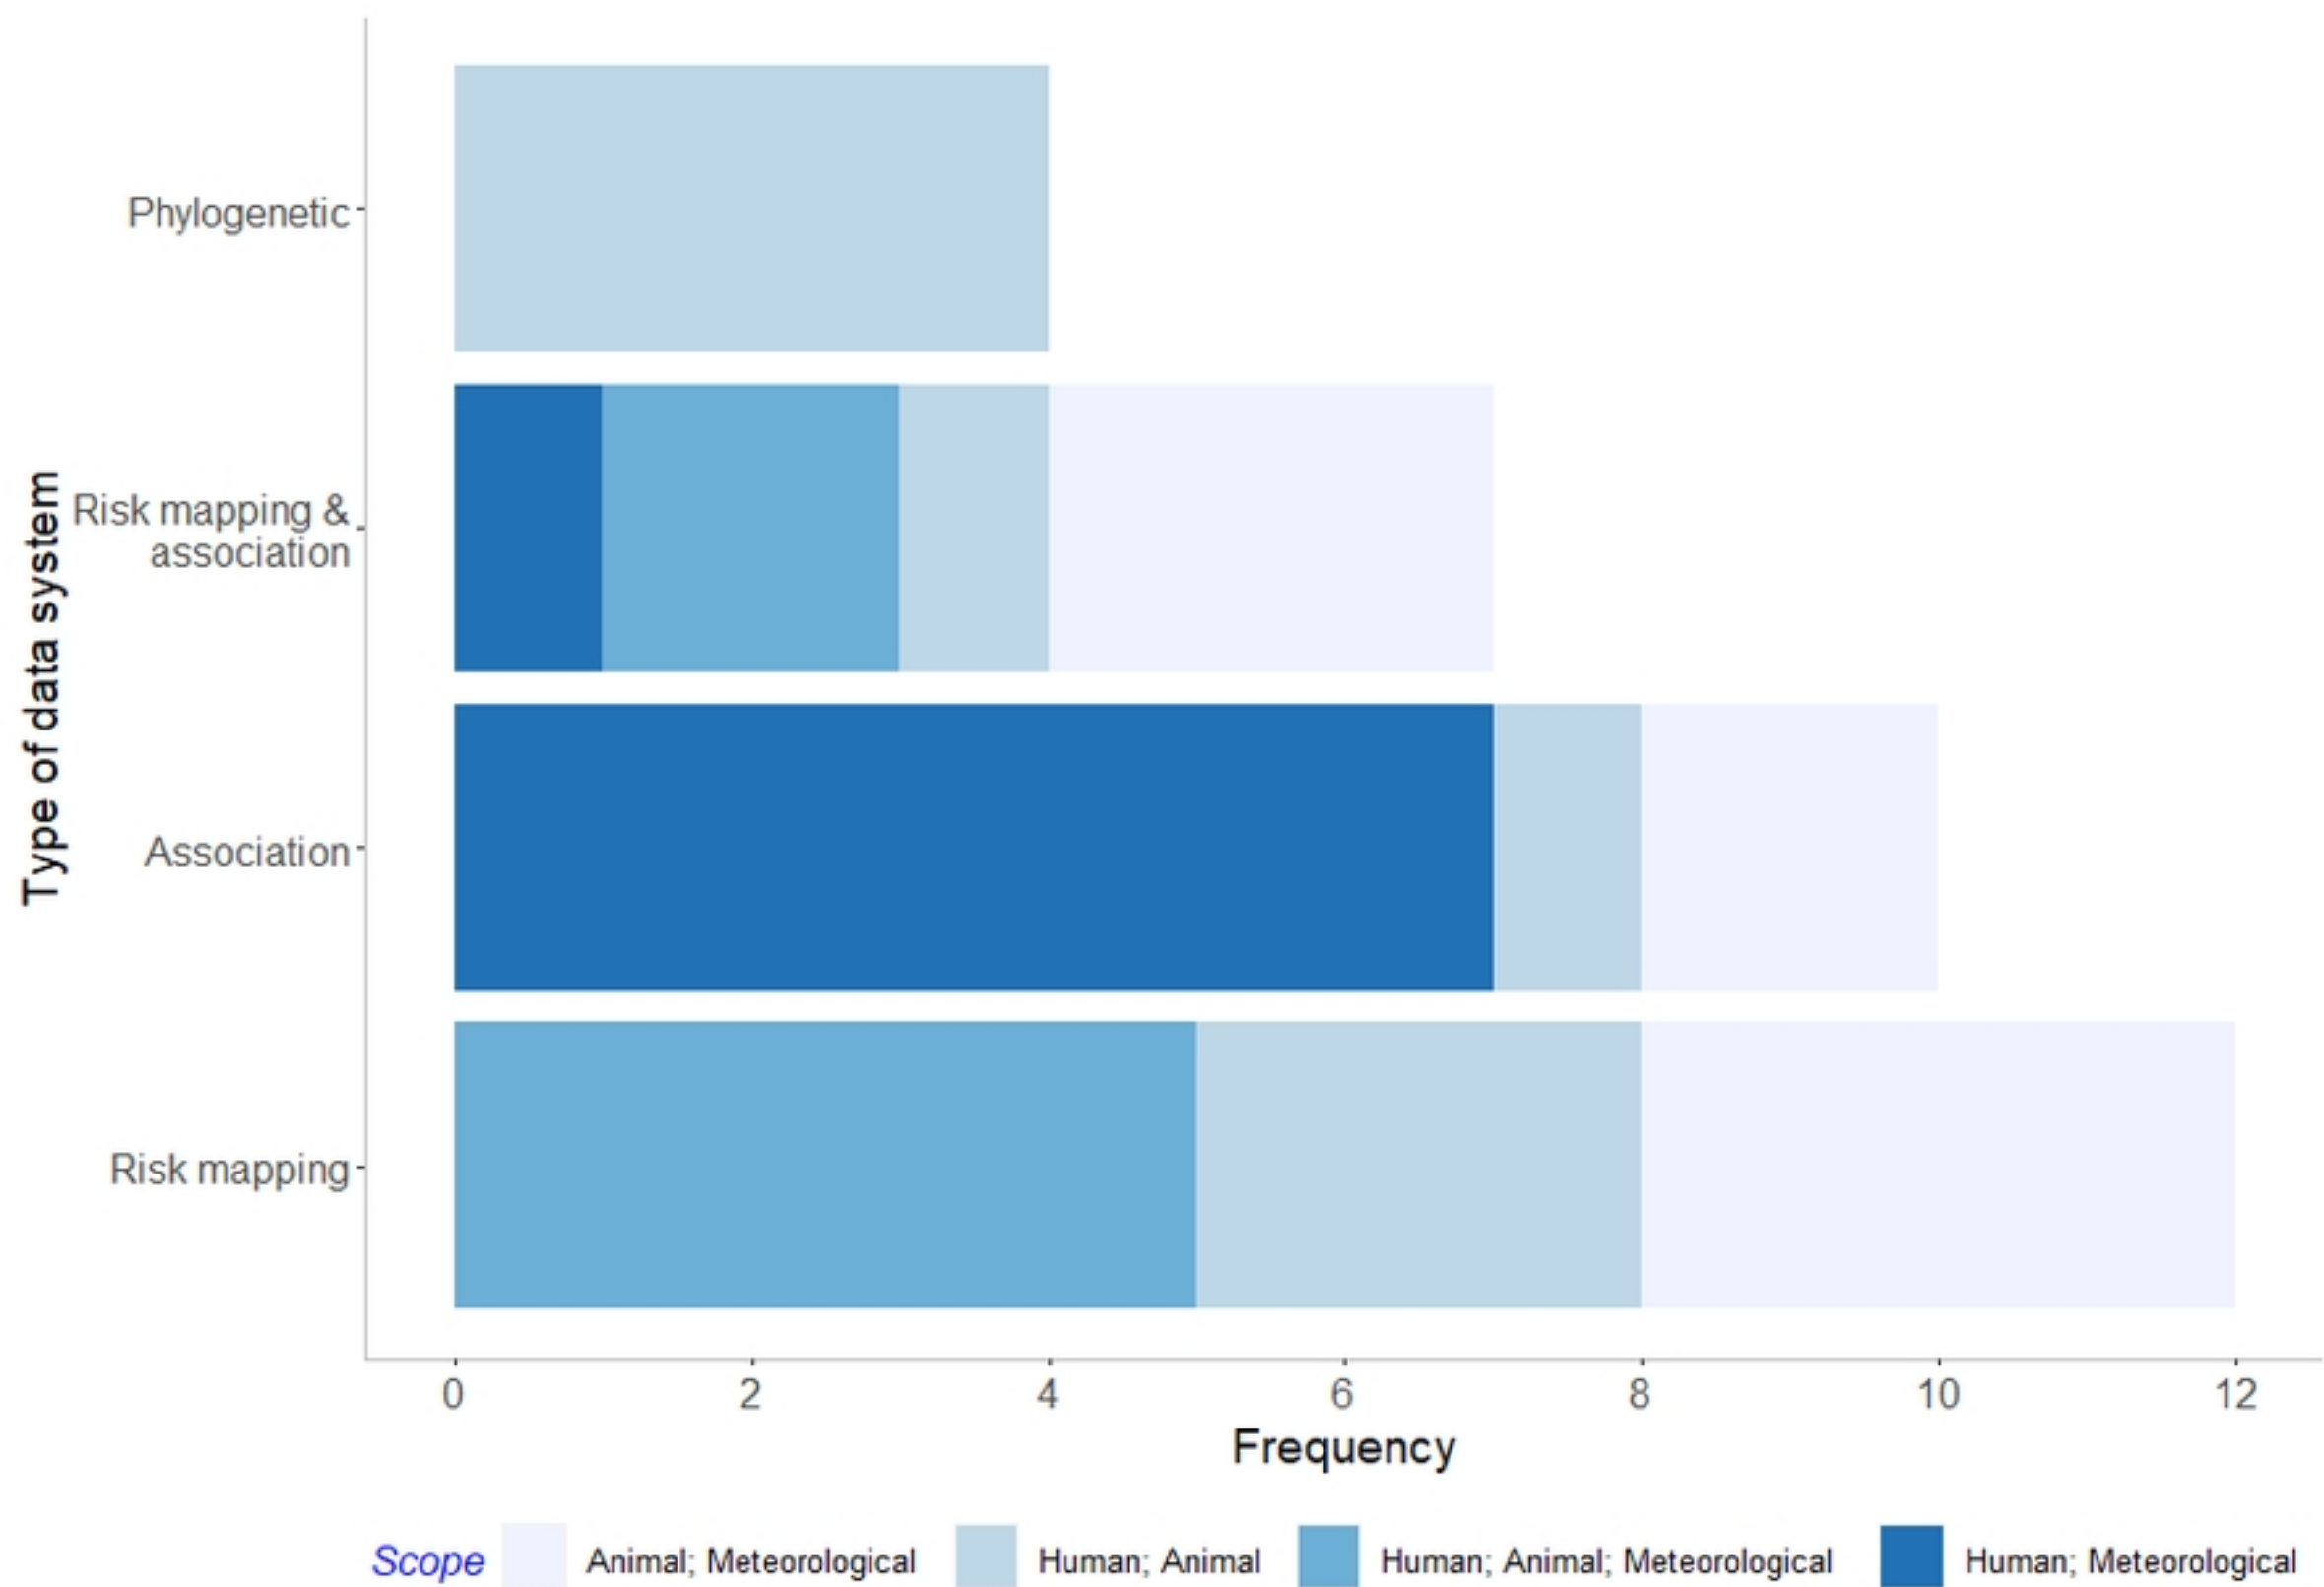

Fig9



Priority setting

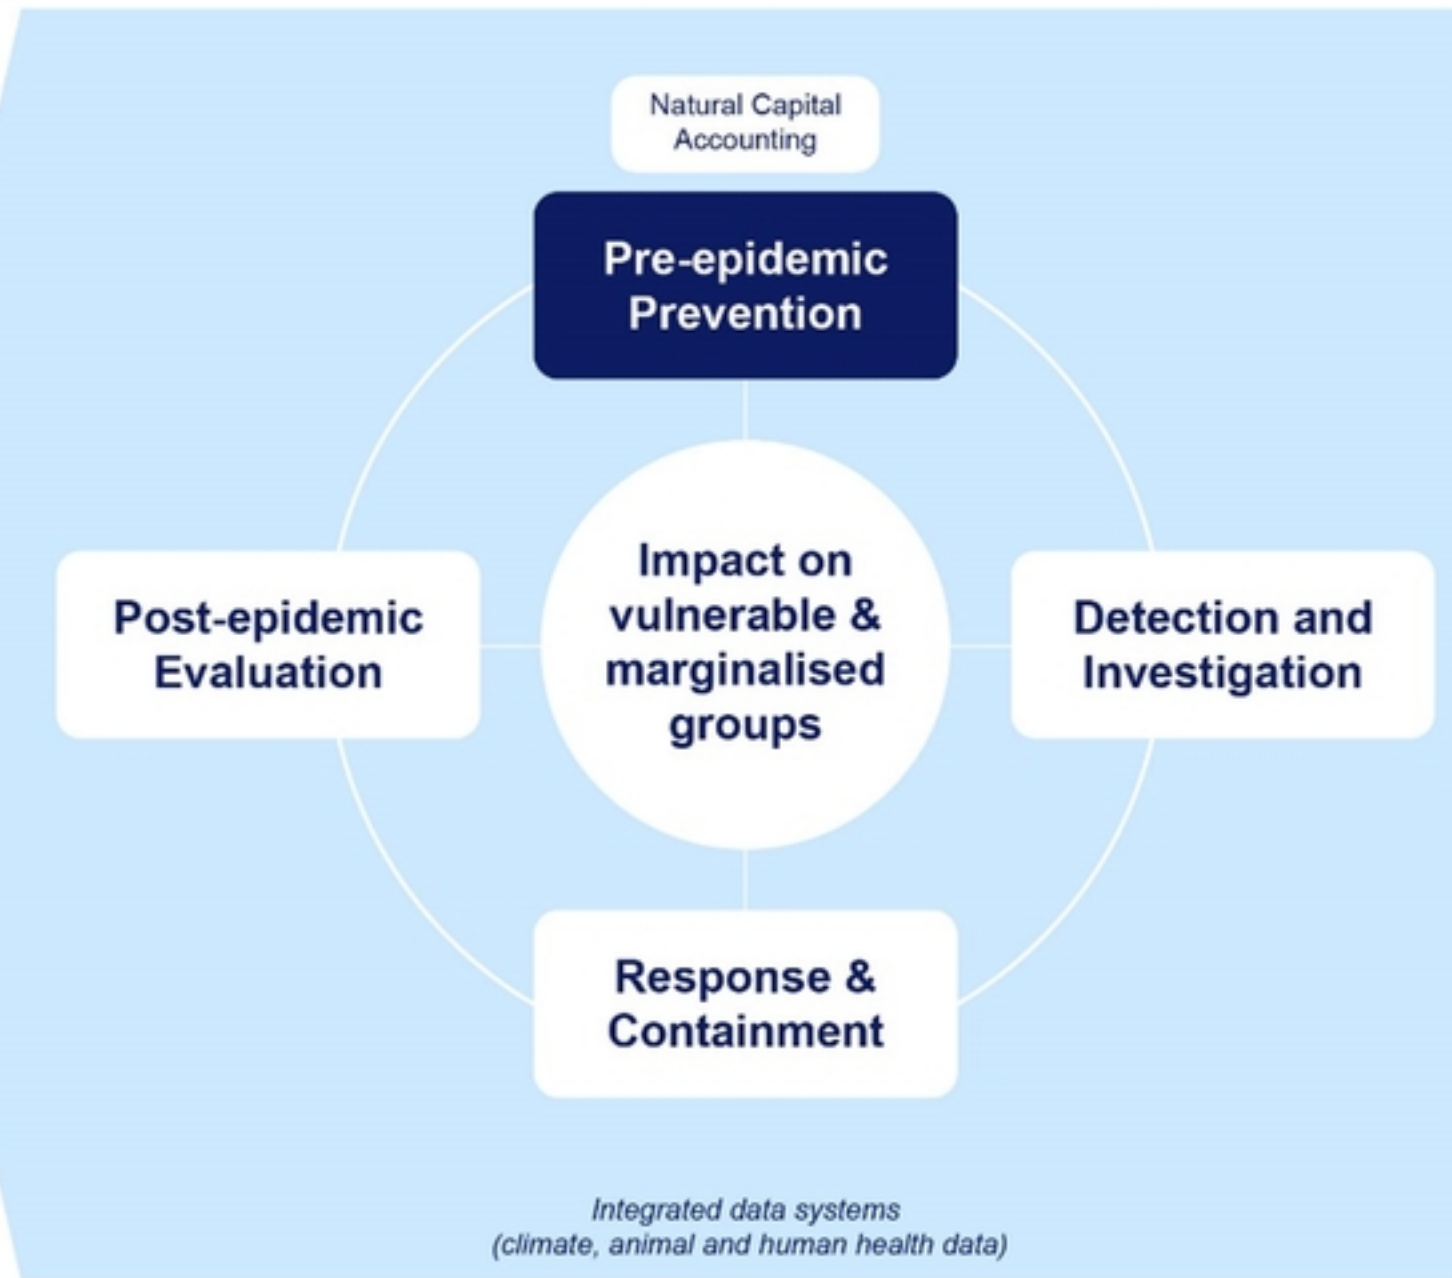

## Prevention

Priority setting for processes to prevent emergence and re-emergence of CSIDs, accounting for natural capital

## Detection

Role of detection systems using multisectoral surveillance

## Response

Role of institutionalizing priority-setting using a whole-of-government approach

## Evaluation

Reflection on resource allocation and impact on population health (value for money)

Fig1

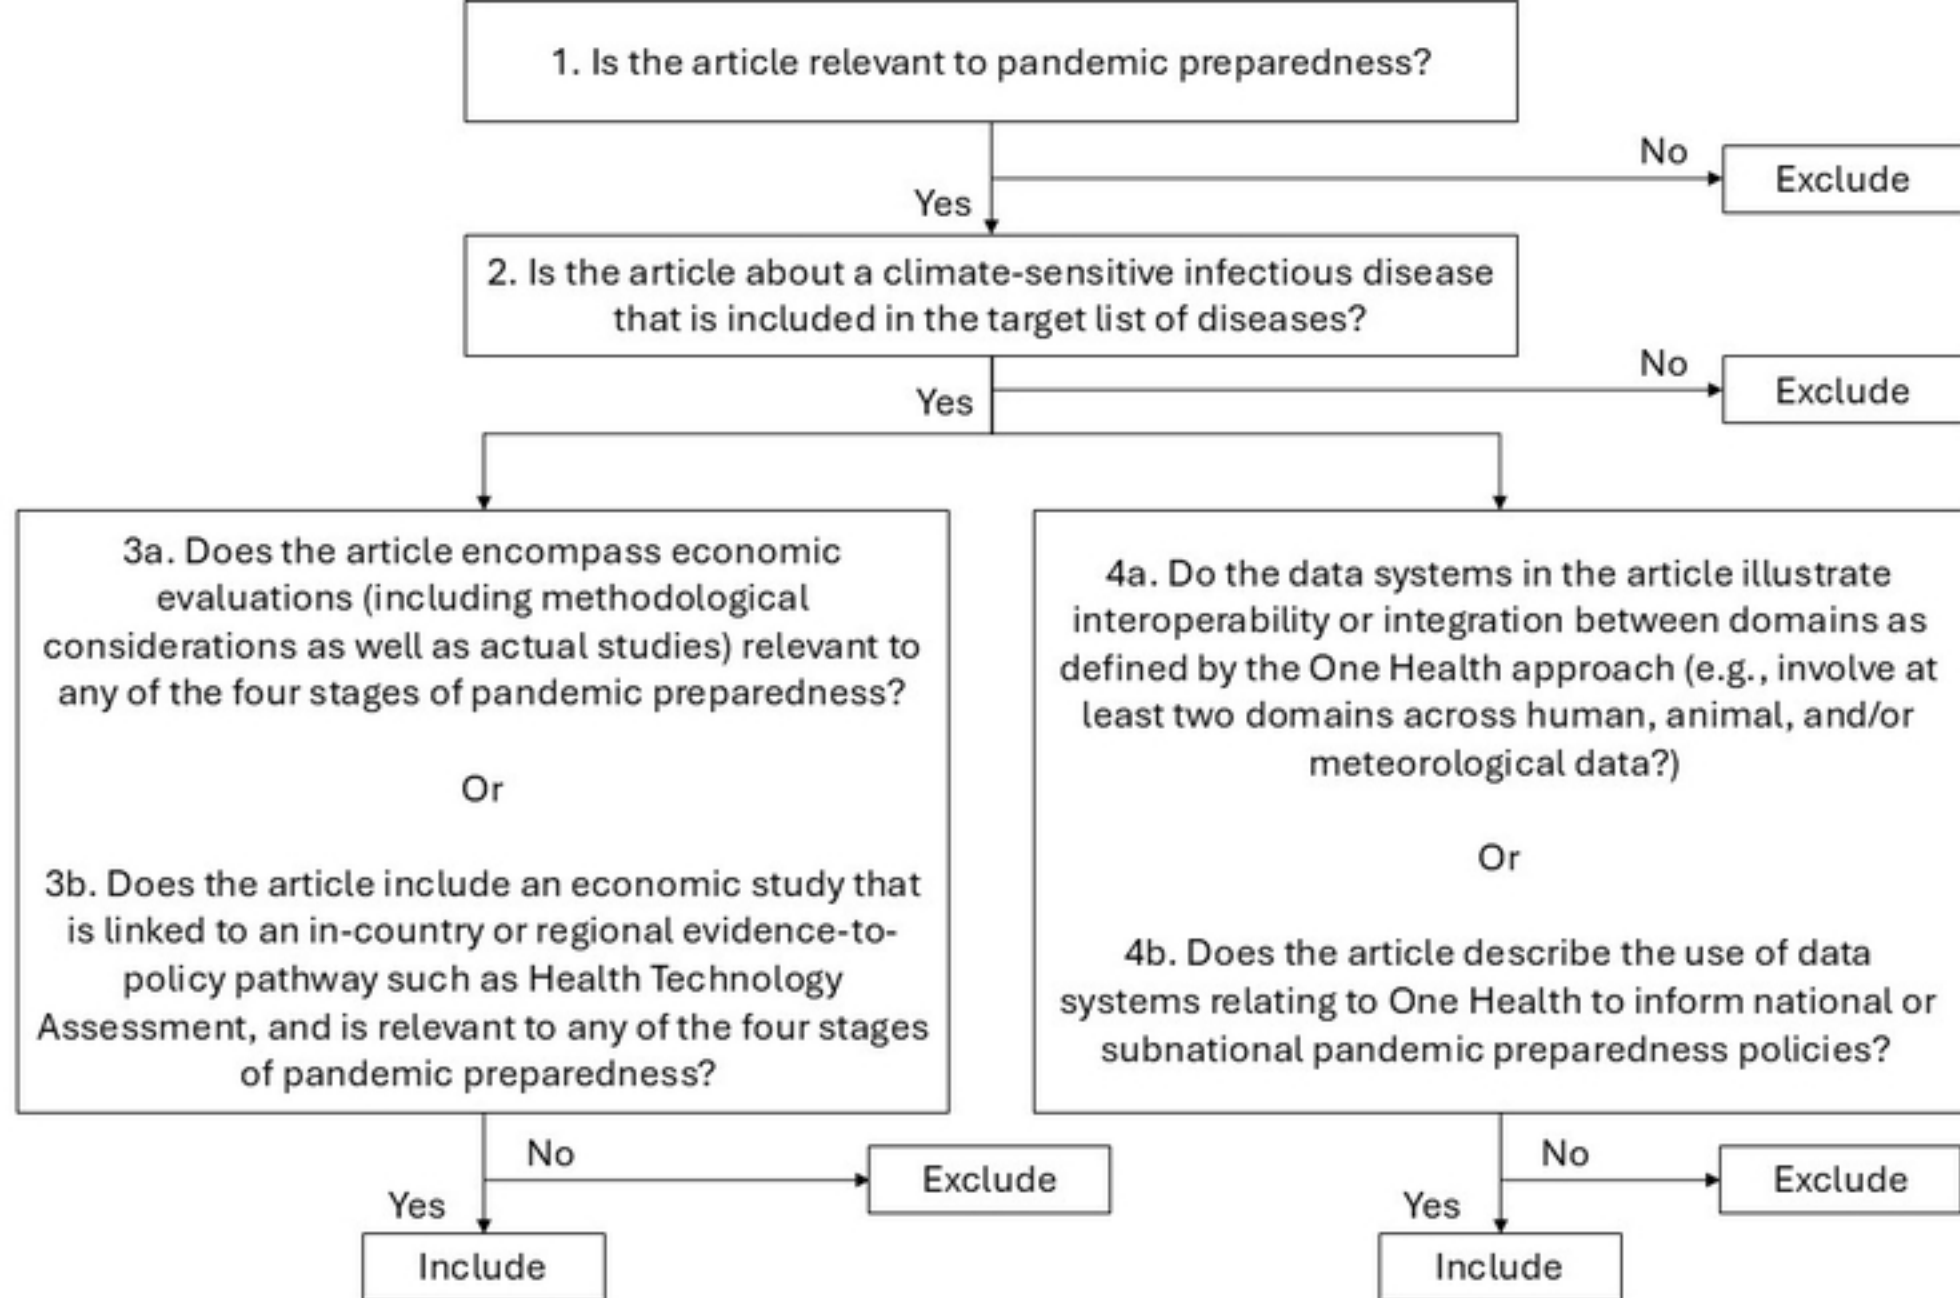

Fig2

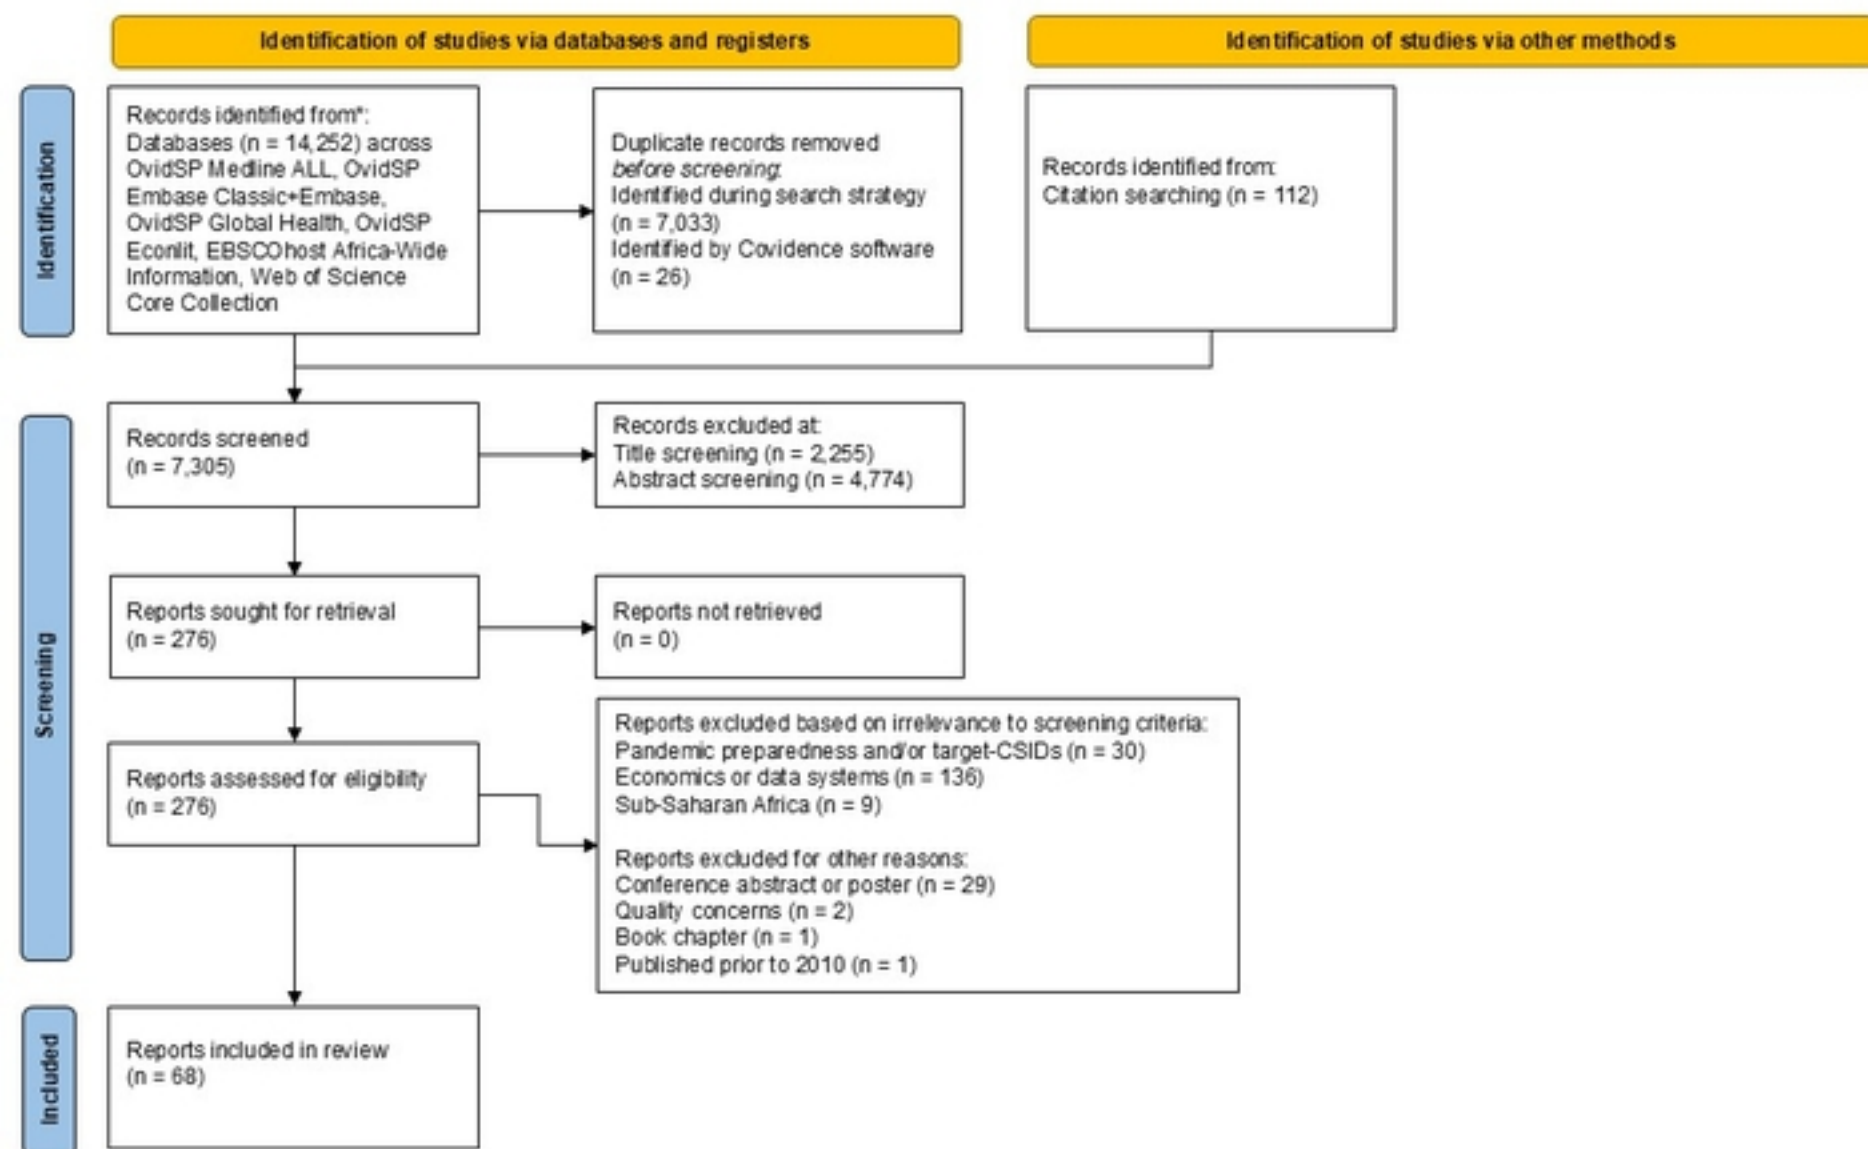

Fig3

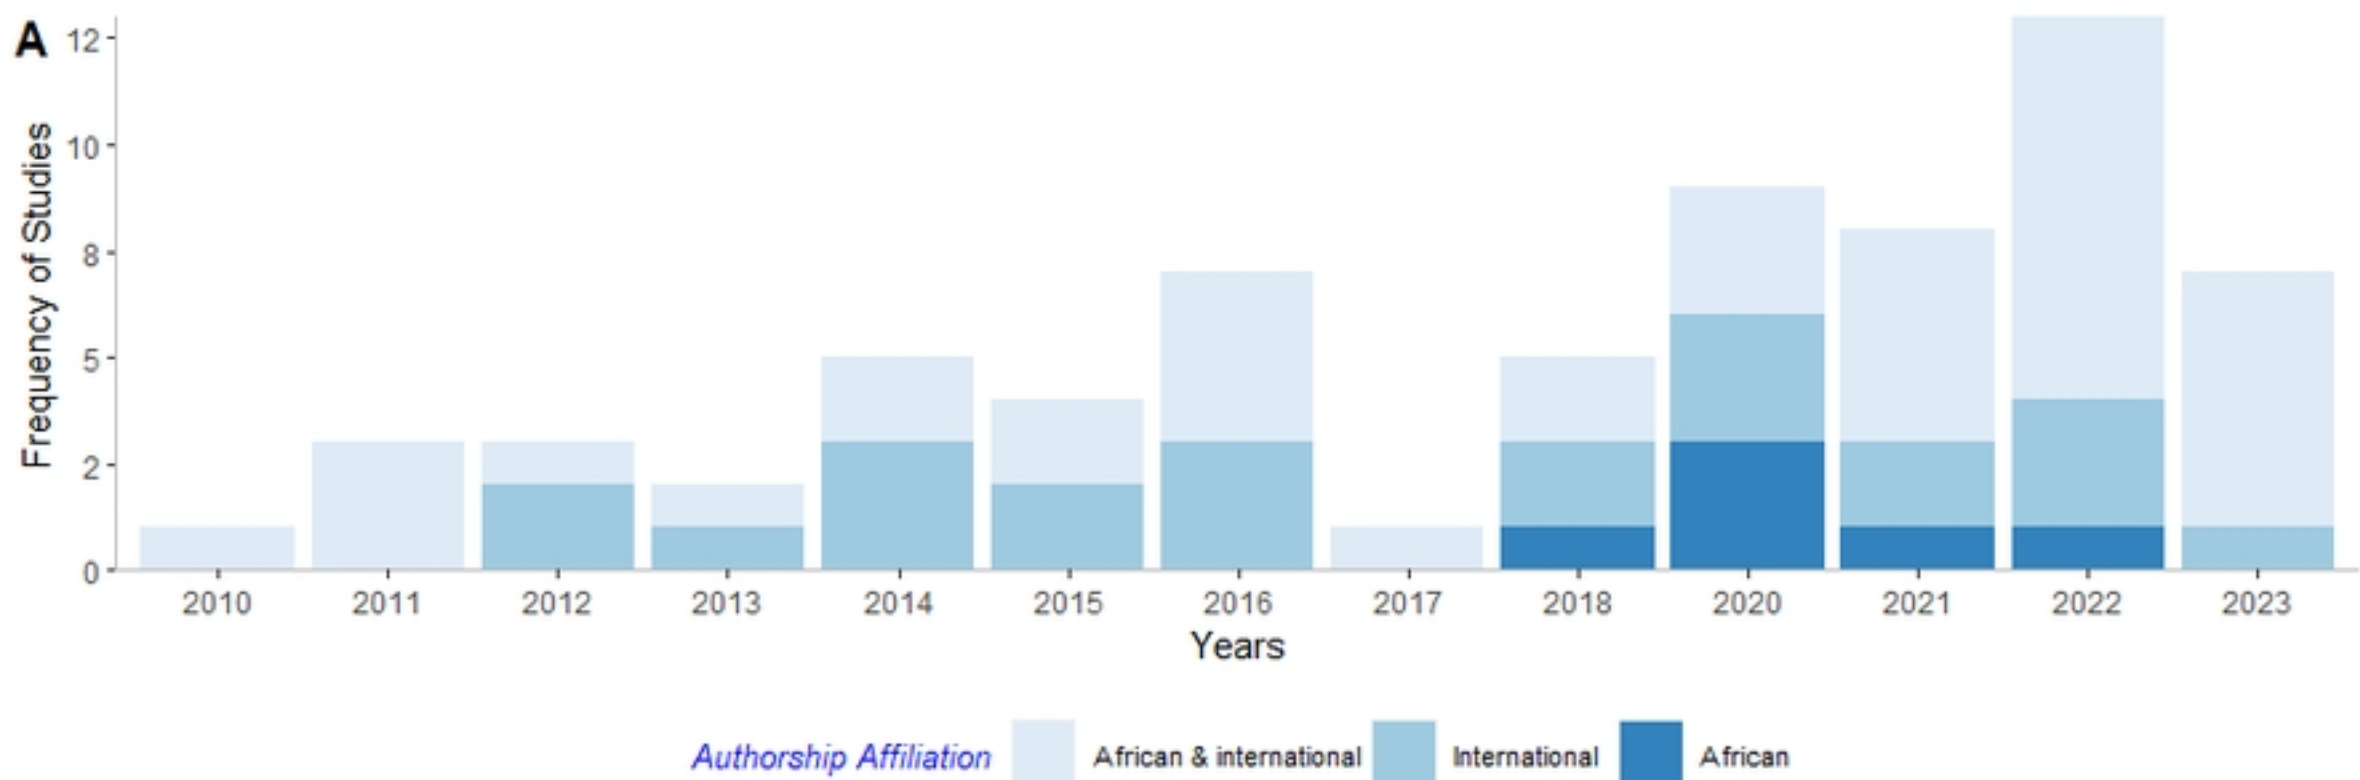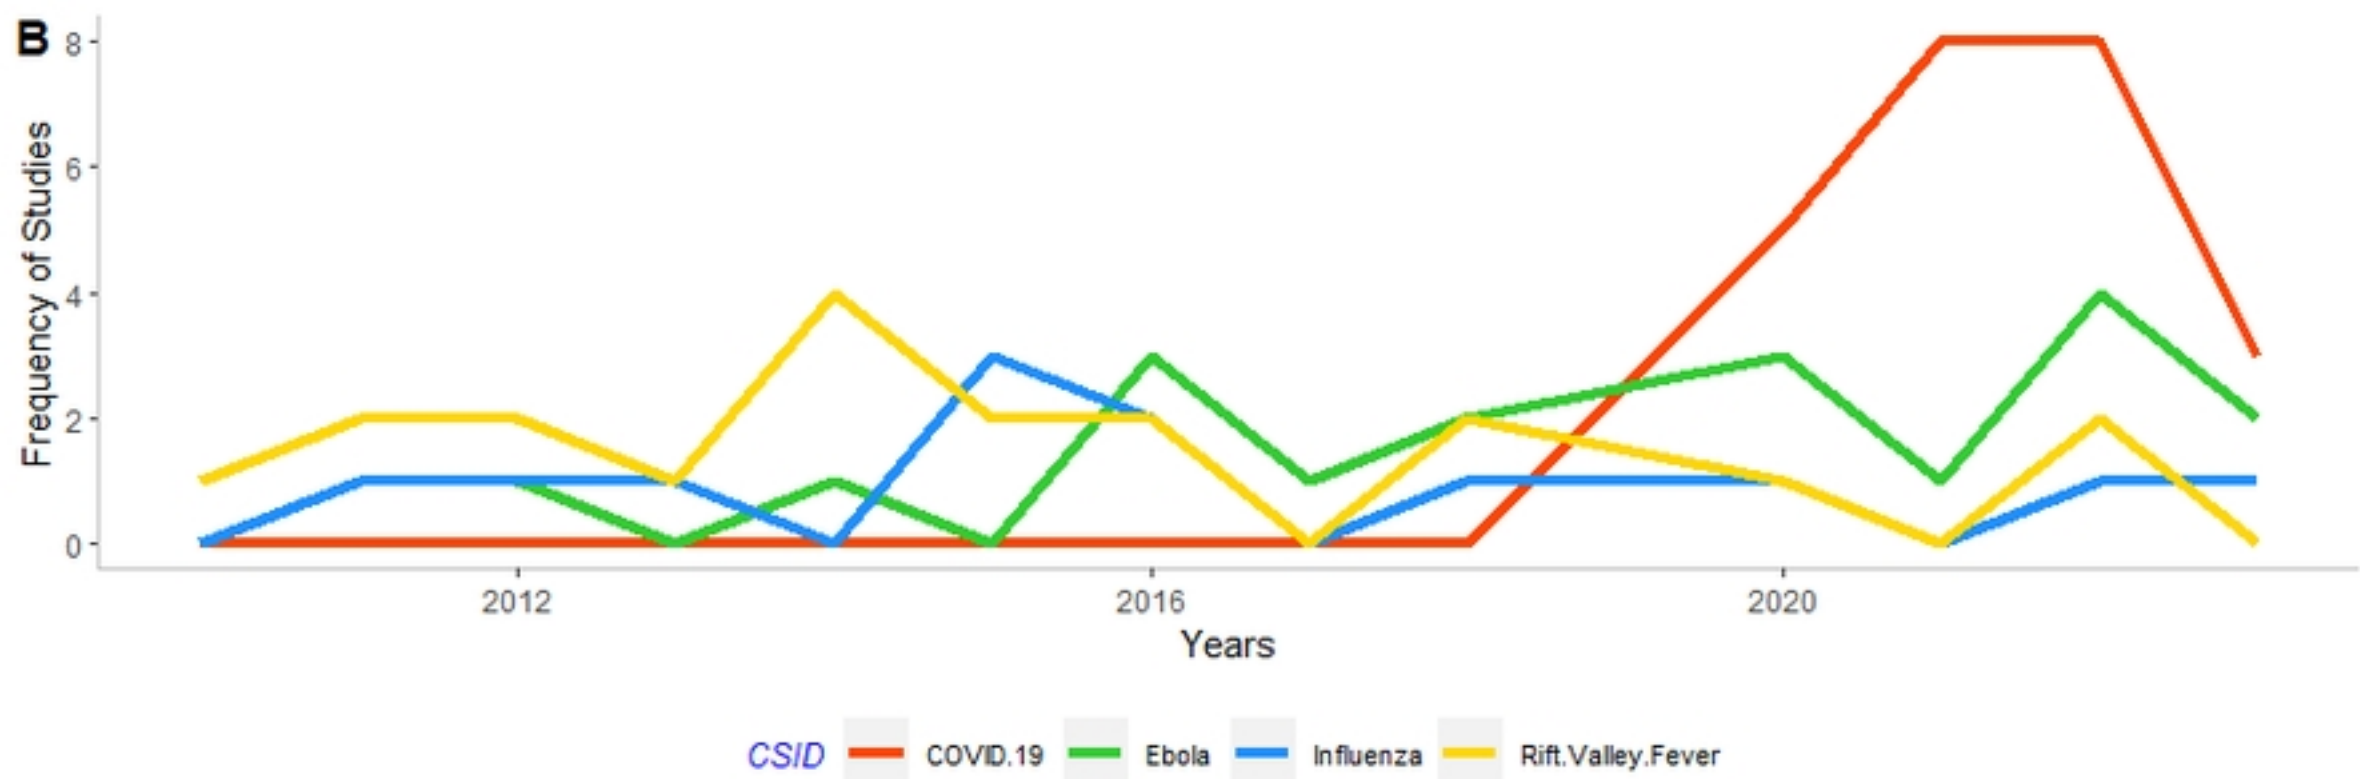

Fig4

**A****Distribution of data system studies**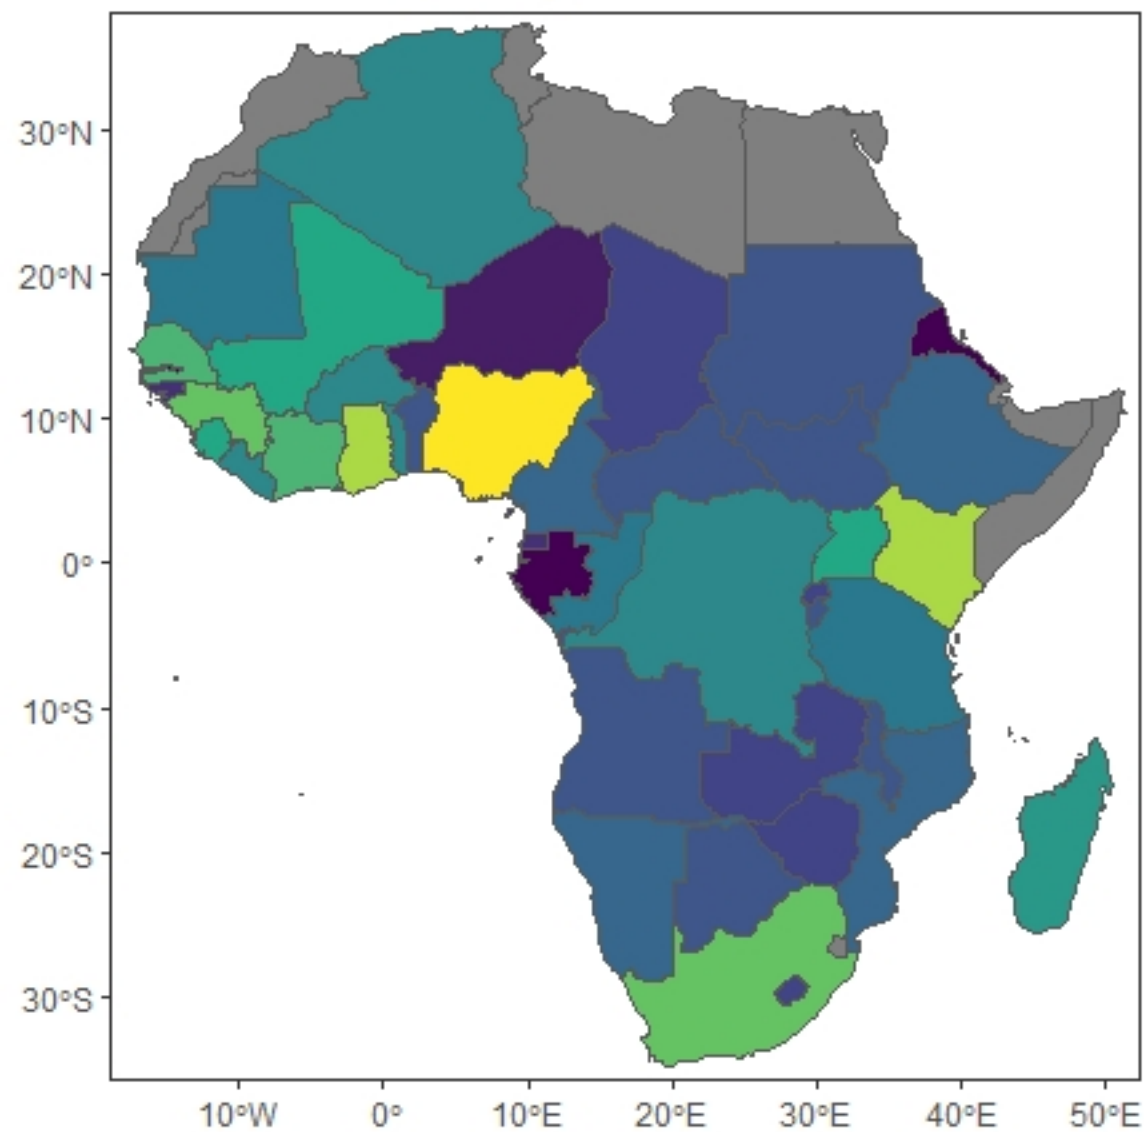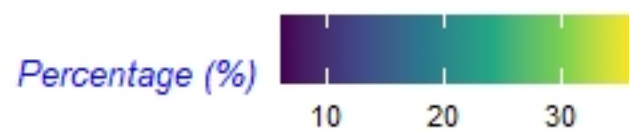**B****Distribution of economic studies**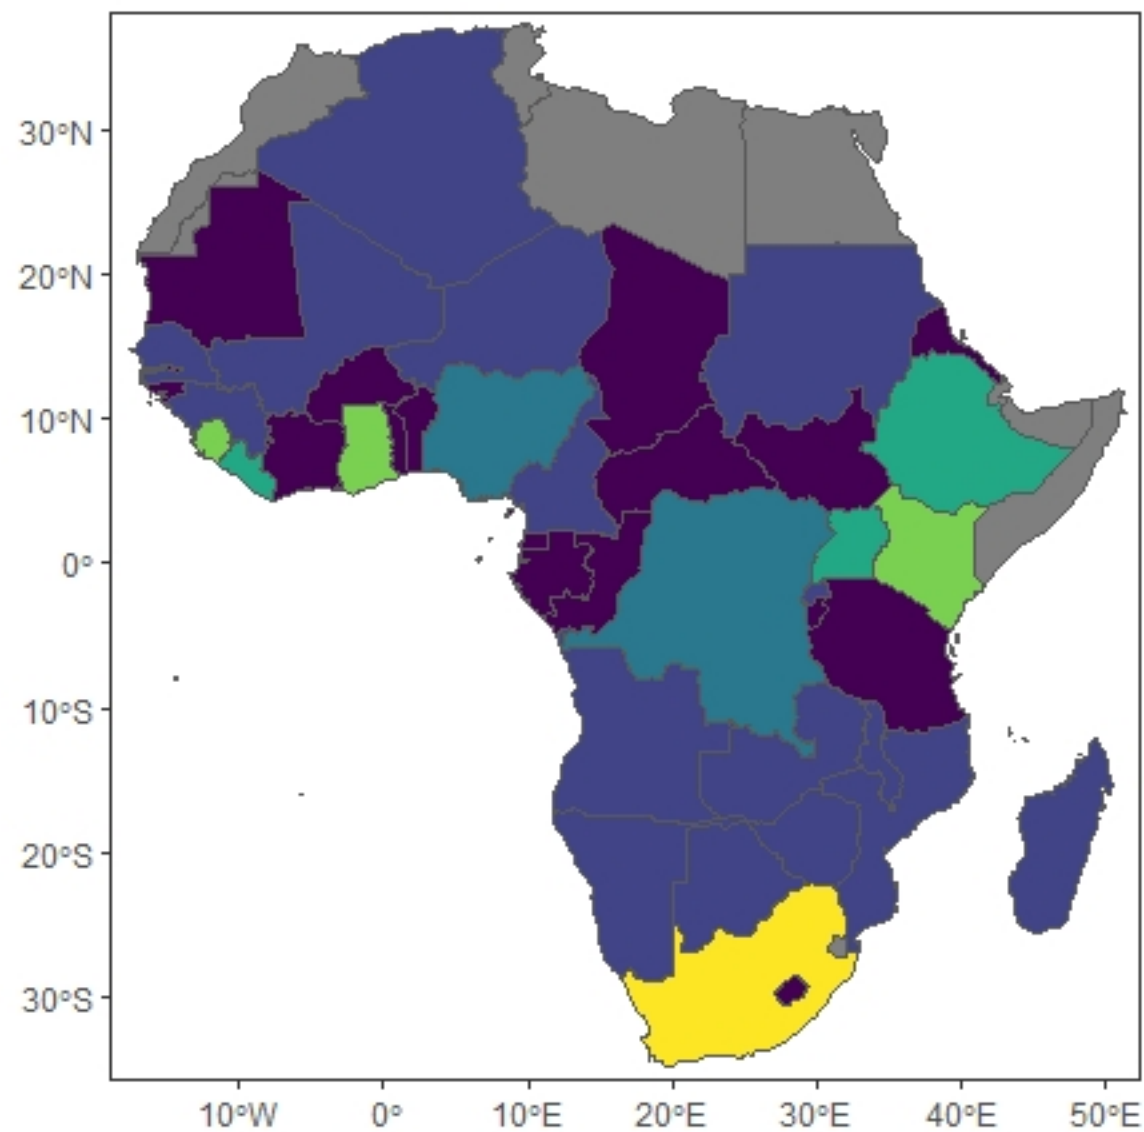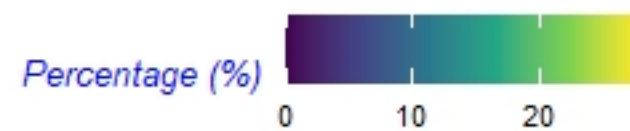**Fig5**
